# Supplementary material for: Sample neutron irradiation with the Min Jiang Testing Reactor (MJTR): implications for high-precision 40Ar/39Ar dating
Source: Royal Society of Chemistry journal article supplement (doi:10.1039/d3ja00048f), 2023-01-01
Supplement: d3ja00048f1.pdf [file d3ja00048f1.pdf]

Sample number: C1, Position: 0.58 mm, J value = 0.0005695 ± 0.0000011

| Step | Laser power |   | <sup>36</sup> Ar <sub>air</sub> | <sup>37</sup> Ar <sub>Ca</sub> | <sup>38</sup> Ar <sub>Cl</sub> | <sup>39</sup> Ar <sub>K</sub> | <sup>40</sup> Ar* | Age (Ma) | ± 2s       | <sup>40</sup> Ar* (%) | <sup>39</sup> Ar <sub>K</sub> (%) | K/Ca | ± 2s   |
|------|-------------|---|---------------------------------|--------------------------------|--------------------------------|-------------------------------|-------------------|----------|------------|-----------------------|-----------------------------------|------|--------|
| 1    | 5.00%       |   | 2.524                           | 0.924                          | 0.934                          | 76.798                        | 9102.540          | 0.000644 | ±0.0000051 | 92.4                  | 3.65                              | 35.7 | ±74.1  |
| 2    | 6.30%       |   | 1.780                           | 0.000                          | 1.793                          | 148.244                       | 19381.230         | 0.000584 | ±0.0000038 | 97.4                  | 7.05                              |      |        |
| 3    | 7.50%       | Δ | 1.438                           | 2.388                          | 3.044                          | 254.939                       | 34023.780         | 0.000572 | ±0.0000035 | 98.8                  | 12.1                              | 45.9 | ±43.0  |
| 4    | 8.00%       | Δ | 0.618                           | 0.901                          | 2.138                          | 179.989                       | 24153.060         | 0.000569 | ±0.0000036 | 99.2                  | 8.56                              | 85.9 | ±166.6 |
| 5    | 8.50%       | Δ | 0.573                           | 1.694                          | 1.921                          | 159.174                       | 21399.350         | 0.000568 | ±0.0000036 | 99.2                  | 7.57                              | 40.4 | ±45.9  |
| 6    | 9.20%       | Δ | 0.586                           | 1.935                          | 1.851                          | 153.939                       | 20686.340         | 0.000568 | ±0.0000036 | 99.2                  | 7.32                              | 34.2 | ±30.3  |
| 7    | 10.00%      | Δ | 0.314                           | 1.800                          | 1.412                          | 116.215                       | 15620.430         | 0.000568 | ±0.0000038 | 99.4                  | 5.53                              | 27.8 | ±35.4  |
| 8    | 11.50%      | Δ | 0.509                           | 2.029                          | 2.142                          | 173.013                       | 23235.410         | 0.000568 | ±0.0000036 | 99.4                  | 8.23                              | 36.7 | ±41.7  |
| 9    | 13.00%      | Δ | 0.549                           | 5.439                          | 2.243                          | 184.046                       | 24708.430         | 0.000569 | ±0.0000036 | 99.3                  | 8.75                              | 14.5 | ±5.1   |
| 10   | 15.00%      | Δ | 0.382                           | 6.341                          | 2.084                          | 171.089                       | 22947.680         | 0.000569 | ±0.0000036 | 99.5                  | 8.14                              | 11.6 | ±3.3   |
| 11   | 18.00%      | Δ | 0.623                           | 22.374                         | 3.071                          | 253.498                       | 33807.710         | 0.000572 | ±0.0000035 | 99.5                  | 12.1                              | 4.9  | ±0.4   |
| 12   | 25.00%      | Δ | 0.519                           | 25.194                         | 2.819                          | 232.034                       | 30987.220         | 0.000572 | ±0.0000035 | 99.5                  | 11                                | 4.0  | ±0.3   |

Sample number: C7, Position: 15.42 mm, J value = 0.0005766 ± 0.0000013

| Step | Laser power |   | <sup>36</sup> Ar <sub>air</sub> | <sup>37</sup> Ar <sub>Ca</sub> | <sup>38</sup> Ar <sub>Cl</sub> | <sup>39</sup> Ar <sub>K</sub> | <sup>40</sup> Ar* | Age (Ma) | ± 2s       | <sup>40</sup> Ar* (%) | <sup>39</sup> Ar <sub>K</sub> (%) | K/Ca  | ± 2s   |
|------|-------------|---|---------------------------------|--------------------------------|--------------------------------|-------------------------------|-------------------|----------|------------|-----------------------|-----------------------------------|-------|--------|
| 1    | 5.00%       |   | 3.750                           | 3.348                          | 0.558                          | 41.611                        | 4991.050          | 0.000636 | ±0.0000055 | 81.8                  | 2.99                              | 5.3   | ±3.6   |
| 2    | 6.30%       |   | 1.888                           | 1.959                          | 1.131                          | 89.598                        | 11615.530         | 0.000589 | ±0.0000025 | 95.4                  | 6.43                              | 19.7  | ±20.7  |
| 3    | 7.50%       | Δ | 1.673                           | 0.598                          | 1.783                          | 140.643                       | 18478.700         | 0.000581 | ±0.0000019 | 97.4                  | 10.1                              | 101.2 | ±386.9 |
| 4    | 8.00%       | Δ | 0.739                           | 0.744                          | 1.261                          | 101.997                       | 13464.740         | 0.000578 | ±0.0000022 | 98.4                  | 7.32                              | 59.0  | ±167.3 |
| 5    | 8.60%       | Δ | 0.722                           | 0.990                          | 1.605                          | 128.219                       | 16979.240         | 0.000576 | ±0.0000019 | 98.8                  | 9.2                               | 55.7  | ±119.4 |
| 6    | 9.50%       | Δ | 0.553                           | 1.476                          | 1.620                          | 127.247                       | 16894.720         | 0.000575 | ±0.0000018 | 99                    | 9.13                              | 37.1  | ±48.7  |
| 7    | 10.50%      | Δ | 0.444                           | 0.465                          | 1.612                          | 129.486                       | 17212.640         | 0.000574 | ±0.0000018 | 99.2                  | 9.29                              | 119.6 | ±543.0 |
| 8    | 11.50%      | Δ | 0.405                           | 0.474                          | 1.496                          | 119.447                       | 15835.470         | 0.000576 | ±0.0000019 | 99.2                  | 8.57                              | 108.3 | ±560.3 |
| 9    | 13.00%      | Δ | 0.530                           | 0.880                          | 1.847                          | 147.350                       | 19522.700         | 0.000576 | ±0.0000017 | 99.2                  | 10.6                              | 72.0  | ±170.8 |
| 10   | 15.00%      | Δ | 0.346                           | 3.987                          | 1.483                          | 119.356                       | 15807.210         | 0.000576 | ±0.0000019 | 99.4                  | 8.57                              | 12.9  | ±6.1   |
| 11   | 18.00%      | Δ | 0.816                           | 14.606                         | 3.048                          | 248.226                       | 32854.660         | 0.000577 | ±0.0000014 | 99.3                  | 17.8                              | 7.3   | ±1.1   |

Sample number: C13, Position: 30.75 mm, J value = 0.0005781 ± 0.0000012

| Step | Laser power |   | <sup>36</sup> Ar <sub>air</sub> | <sup>37</sup> Ar <sub>Ca</sub> | <sup>38</sup> Ar <sub>Cl</sub> | <sup>39</sup> Ar <sub>K</sub> | <sup>40</sup> Ar* | Age (Ma) | ± 2s       | <sup>40</sup> Ar* (%) | <sup>39</sup> Ar <sub>K</sub> (%) | K/Ca  | ± 2s    |
|------|-------------|---|---------------------------------|--------------------------------|--------------------------------|-------------------------------|-------------------|----------|------------|-----------------------|-----------------------------------|-------|---------|
| 1    | 5.00%       |   | 2.830                           | 1.606                          | 0.641                          | 45.746                        | 5434.000          | 0.000643 | ±0.0000067 | 86.5                  | 2.77                              | 12.2  | ±17.8   |
| 2    | 6.30%       |   | 1.430                           | 1.471                          | 1.046                          | 78.067                        | 10093.280         | 0.00059  | ±0.0000043 | 95.9                  | 4.73                              | 22.8  | ±35.9   |
| 3    | 7.50%       | Δ | 1.251                           | 2.224                          | 1.609                          | 122.983                       | 16115.290         | 0.000583 | ±0.0000039 | 97.7                  | 7.45                              | 23.8  | ±25.6   |
| 4    | 8.00%       | Δ | 0.720                           | 0.692                          | 1.570                          | 120.343                       | 15853.310         | 0.000579 | ±0.0000038 | 98.7                  | 7.29                              | 74.7  | ±249.3  |
| 5    | 8.60%       | Δ | 0.531                           | 0.194                          | 1.490                          | 114.555                       | 15123.210         | 0.000578 | ±0.0000039 | 99                    | 6.93                              | 254.1 | ±3268.9 |
| 6    | 9.50%       | Δ | 0.437                           | 0.000                          | 1.574                          | 121.193                       | 16018.140         | 0.000578 | ±0.0000038 | 99.2                  | 7.34                              | 333.8 | ±4317.8 |
| 7    | 10.50%      | Δ | 0.313                           | 0.000                          | 1.536                          | 118.823                       | 15718.430         | 0.000577 | ±0.0000038 | 99.4                  | 7.19                              | 333.8 | ±4317.8 |
| 8    | 11.50%      | Δ | 0.408                           | 1.413                          | 1.676                          | 129.225                       | 17111.880         | 0.000576 | ±0.0000038 | 99.3                  | 7.82                              | 39.3  | ±63.5   |
| 9    | 13.00%      | Δ | 0.567                           | 2.943                          | 2.050                          | 157.159                       | 20808.380         | 0.000577 | ±0.0000037 | 99.2                  | 9.51                              | 23.0  | ±18.5   |
| 10   | 15.00%      | Δ | 0.549                           | 4.471                          | 2.527                          | 194.896                       | 25782.470         | 0.000577 | ±0.0000036 | 99.4                  | 11.8                              | 18.7  | ±10.2   |
| 11   | 18.00%      | Δ | 0.861                           | 11.086                         | 3.732                          | 290.349                       | 38346.080         | 0.000578 | ±0.0000035 | 99.3                  | 17.6                              | 11.3  | ±2.3    |
| 12   | 22.00%      | Δ | 0.449                           | 15.824                         | 2.050                          | 158.519                       | 20920.250         | 0.000578 | ±0.0000037 | 99.4                  | 9.6                               | 4.3   | ±0.6    |

Sample number: C25, Position: 47.83 mm, J value = 0.0005730 ± 0.0000007

| Step | Laser power |   | <sup>36</sup> Ar <sub>air</sub> | <sup>37</sup> Ar <sub>Ca</sub> | <sup>38</sup> Ar <sub>Cl</sub> | <sup>39</sup> Ar <sub>K</sub> | <sup>40</sup> Ar* | Age (Ma) | ± 2s       | <sup>40</sup> Ar* (%) | <sup>39</sup> Ar <sub>K</sub> (%) | K/Ca | ± 2s   |
|------|-------------|---|---------------------------------|--------------------------------|--------------------------------|-------------------------------|-------------------|----------|------------|-----------------------|-----------------------------------|------|--------|
| 1    | 5.00%       |   | 11.309                          | 3.320                          | 0.664                          | 43.473                        | 5230.730          | 0.000634 | ±0.0000055 | 60.8                  | 3.01                              | 5.6  | ±3.1   |
| 2    | 6.30%       |   | 2.967                           | 2.465                          | 1.008                          | 74.922                        | 9761.470          | 0.000586 | ±0.0000021 | 91.7                  | 5.18                              | 13.1 | ±9.4   |
| 3    | 7.50%       |   | 2.615                           | 1.985                          | 1.474                          | 113.500                       | 14946.510         | 0.00058  | ±0.0000017 | 95                    | 7.85                              | 24.6 | ±24.0  |
| 4    | 8.00%       |   | 1.564                           | 0.600                          | 1.097                          | 81.499                        | 10787.890         | 0.000577 | ±0.0000019 | 95.8                  | 5.64                              | 58.4 | ±184.7 |
| 5    | 8.60%       | Δ | 1.023                           | 2.157                          | 1.096                          | 80.775                        | 10736.670         | 0.000574 | ±0.0000018 | 97.2                  | 5.59                              | 16.1 | ±13.7  |
| 6    | 9.50%       | Δ | 1.004                           | 1.432                          | 1.443                          | 107.234                       | 14248.670         | 0.000574 | ±0.0000016 | 97.9                  | 7.42                              | 32.2 | ±41.2  |
| 7    | 10.50%      | Δ | 0.752                           | 1.603                          | 1.732                          | 128.922                       | 17172.530         | 0.000573 | ±0.0000015 | 98.7                  | 8.92                              | 34.6 | ±41.0  |
| 8    | 11.50%      | Δ | 0.676                           | 2.031                          | 1.742                          | 131.136                       | 17477.540         | 0.000573 | ±0.0000015 | 98.9                  | 9.07                              | 27.8 | ±28.4  |
| 9    | 13.00%      | Δ | 0.918                           | 3.687                          | 2.601                          | 196.407                       | 26209.690         | 0.000572 | ±0.0000014 | 99                    | 13.6                              | 22.9 | ±12.2  |
| 10   | 15.00%      | Δ | 1.059                           | 6.253                          | 3.457                          | 262.120                       | 34960.960         | 0.000572 | ±0.0000013 | 99.1                  | 18.1                              | 18.0 | ±5.2   |
| 11   | 22.00%      | Δ | 0.933                           | 17.791                         | 2.988                          | 225.664                       | 30033.440         | 0.000574 | ±0.0000013 | 99.1                  | 15.6                              | 5.5  | ±0.7   |

Table S1 Raw data for the J value results of ZBH-25.

Sample number: C31, Position: 59.62 mm, J value = 0.0005674 ± 0.0000005

| Step | Laser power | <sup>36</sup> Ar <sub>air</sub> | <sup>37</sup> Ar <sub>Ca</sub> | <sup>38</sup> Ar <sub>Cl</sub> | <sup>39</sup> Ar <sub>K</sub> | <sup>40</sup> Ar* | Age (Ma) | ± 2s       | <sup>40</sup> Ar* (%) | <sup>39</sup> Ar <sub>K</sub> (%) | K/Ca  | ± 2s    |
|------|-------------|---------------------------------|--------------------------------|--------------------------------|-------------------------------|-------------------|----------|------------|-----------------------|-----------------------------------|-------|---------|
| 1    | 5.00%       | 4.204                           | 0.681                          | 0.419                          | 26.141                        | 2989.430          | 0.000667 | ±0.0000095 | 70.6                  | 1.34                              | 16.5  | ±47.2   |
| 2    | 6.30%       | 1.818                           | 1.632                          | 1.171                          | 82.934                        | 10643.420         | 0.000595 | ±0.0000026 | 95.2                  | 4.24                              | 21.9  | ±28.4   |
| 3    | 7.50%       | 1.686                           | 0.235                          | 2.187                          | 154.308                       | 20585.380         | 0.000572 | ±0.0000016 | 97.6                  | 7.89                              | 281.8 | ±2125.5 |
| 4    | 8.00%       | Δ 0.946                         | 1.230                          | 1.664                          | 122.650                       | 16503.250         | 0.000567 | ±0.0000018 | 98.3                  | 6.27                              | 42.9  | ±72.1   |
| 5    | 8.60%       | Δ 0.907                         | 1.699                          | 2.066                          | 148.708                       | 19995.750         | 0.000568 | ±0.0000017 | 98.7                  | 7.61                              | 37.6  | ±47.5   |
| 6    | 9.50%       | Δ 0.696                         | 1.099                          | 2.026                          | 151.746                       | 20386.990         | 0.000568 | ±0.0000016 | 99                    | 7.76                              | 59.4  | ±116.9  |
| 7    | 10.50%      | Δ 0.491                         | 2.136                          | 2.085                          | 156.178                       | 20987.040         | 0.000568 | ±0.0000016 | 99.3                  | 7.99                              | 31.4  | ±28.9   |
| 8    | 11.50%      | Δ 0.555                         | 3.103                          | 2.238                          | 165.529                       | 22255.580         | 0.000568 | ±0.0000016 | 99.3                  | 8.47                              | 22.9  | ±14.0   |
| 9    | 13.00%      | Δ 0.763                         | 7.682                          | 2.884                          | 212.352                       | 28622.230         | 0.000566 | ±0.0000014 | 99.2                  | 10.9                              | 11.9  | ±3.0    |
| 10   | 15.00%      | Δ 0.724                         | 9.640                          | 3.278                          | 240.779                       | 32384.110         | 0.000568 | ±0.0000014 | 99.3                  | 12.3                              | 10.7  | ±2.1    |
| 11   | 18.00%      | Δ 0.922                         | 19.556                         | 3.659                          | 266.547                       | 35827.230         | 0.000568 | ±0.0000014 | 99.2                  | 13.6                              | 5.9   | ±0.6    |
| 12   | 22.00%      | Δ 0.747                         | 14.648                         | 3.123                          | 226.734                       | 30562.940         | 0.000566 | ±0.0000014 | 99.3                  | 11.6                              | 6.7   | ±0.9    |

Sample number: C35, Position: 67.63 mm, J value = 0.0005647 ± 0.0000008

| Step | Laser power | <sup>36</sup> Ar <sub>air</sub> | <sup>37</sup> Ar <sub>Ca</sub> | <sup>38</sup> Ar <sub>Cl</sub> | <sup>39</sup> Ar <sub>K</sub> | <sup>40</sup> Ar* | Age (Ma) | ± 2s       | <sup>40</sup> Ar* (%) | <sup>39</sup> Ar <sub>K</sub> (%) | K/Ca | ± 2s  |
|------|-------------|---------------------------------|--------------------------------|--------------------------------|-------------------------------|-------------------|----------|------------|-----------------------|-----------------------------------|------|-------|
| 1    | 5.00%       | 13.600                          | 3.184                          | 0.648                          | 41.824                        | 5193.100          | 0.000615 | ±0.0000073 | 56.1                  | 2.45                              | 5.6  | ±3.5  |
| 2    | 6.30%       | 3.196                           | 2.533                          | 1.114                          | 76.529                        | 10161.940         | 0.000575 | ±0.0000029 | 91.4                  | 4.49                              | 13.0 | ±11.1 |
| 3    | 7.50%       | 2.208                           | 3.117                          | 1.518                          | 107.115                       | 14333.260         | 0.00057  | ±0.0000022 | 95.6                  | 6.29                              | 14.8 | ±9.0  |
| 4    | 8.00%       | Δ 0.897                         | 1.270                          | 1.032                          | 71.100                        | 9572.750          | 0.000567 | ±0.0000029 | 97.3                  | 4.17                              | 24.1 | ±37.0 |
| 5    | 8.60%       | Δ 0.847                         | 1.764                          | 1.095                          | 76.364                        | 10277.500         | 0.000567 | ±0.0000027 | 97.6                  | 4.48                              | 18.6 | ±23.6 |
| 6    | 9.50%       | Δ 0.880                         | 3.862                          | 1.424                          | 99.848                        | 13468.160         | 0.000566 | ±0.0000022 | 98.1                  | 5.86                              | 11.1 | ±5.9  |
| 7    | 10.50%      | Δ 0.649                         | 1.639                          | 1.590                          | 113.283                       | 15283.140         | 0.000566 | ±0.0000020 | 98.7                  | 6.65                              | 29.7 | ±35.4 |
| 8    | 11.50%      | Δ 0.680                         | 2.510                          | 1.564                          | 112.507                       | 15172.870         | 0.000566 | ±0.0000021 | 98.7                  | 6.6                               | 19.3 | ±13.9 |
| 9    | 13.00%      | Δ 0.640                         | 4.881                          | 1.944                          | 138.195                       | 18693.000         | 0.000564 | ±0.0000018 | 99                    | 8.11                              | 12.2 | ±5.2  |
| 10   | 15.00%      | Δ 0.651                         | 4.915                          | 2.353                          | 168.722                       | 22854.730         | 0.000564 | ±0.0000016 | 99.2                  | 9.9                               | 14.8 | ±6.1  |
| 11   | 18.00%      | Δ 1.436                         | 10.040                         | 4.864                          | 348.110                       | 47133.020         | 0.000564 | ±0.0000014 | 99.1                  | 20.4                              | 14.9 | ±3.0  |
| 12   | 22.00%      | Δ 1.608                         | 23.851                         | 4.967                          | 350.517                       | 47442.760         | 0.000564 | ±0.0000014 | 99                    | 20.6                              | 6.3  | ±0.5  |

Sample number: D1, Position:0.64 mm, J value = 0.0005804± 0.0000009

| Step | Laser power | <sup>36</sup> Ar <sub>air</sub> | <sup>37</sup> Ar <sub>Ca</sub> | <sup>38</sup> Ar <sub>Cl</sub> | <sup>39</sup> Ar <sub>K</sub> | <sup>40</sup> Ar* | Age (Ma) | ± 2s       | <sup>40</sup> Ar* (%) | <sup>39</sup> Ar <sub>K</sub> (%) | K/Ca  | ± 2s    |
|------|-------------|---------------------------------|--------------------------------|--------------------------------|-------------------------------|-------------------|----------|------------|-----------------------|-----------------------------------|-------|---------|
| 1    | 5.00%       | 2.116                           | 1.719                          | 0.395                          | 32.858                        | 3969.460          | 0.000632 | ±0.0000052 | 86.3                  | 2.41                              | 8.2   | ±11.2   |
| 2    | 6.30%       | 1.421                           | 0.356                          | 1.060                          | 89.152                        | 11422.040         | 0.000596 | ±0.0000021 | 96.4                  | 6.54                              | 107.8 | ±583.9  |
| 3    | 7.50%       | 1.667                           | 1.916                          | 1.735                          | 149.486                       | 19420.940         | 0.000588 | ±0.0000016 | 97.5                  | 11                                | 33.5  | ±34.2   |
| 4    | 8.00%       | 0.712                           | 0.000                          | 1.213                          | 106.451                       | 13931.760         | 0.000583 | ±0.0000019 | 98.5                  | 7.8                               | 177.2 | ±1446.3 |
| 5    | 8.60%       | Δ 0.599                         | 0.000                          | 1.319                          | 114.019                       | 14967.840         | 0.000581 | ±0.0000018 | 98.8                  | 8.36                              | 110.9 | ±595.8  |
| 6    | 9.50%       | Δ 0.512                         | 0.794                          | 1.506                          | 128.486                       | 16898.810         | 0.00058  | ±0.0000017 | 99.1                  | 9.42                              | 69.6  | ±203.1  |
| 7    | 10.50%      | Δ 0.403                         | 0.379                          | 1.566                          | 132.831                       | 17498.750         | 0.000579 | ±0.0000016 | 99.3                  | 9.74                              | 150.7 | ±886.7  |
| 8    | 11.50%      | Δ 0.377                         | 2.873                          | 1.522                          | 133.032                       | 17544.640         | 0.000579 | ±0.0000016 | 99.4                  | 9.75                              | 19.9  | ±15.5   |
| 9    | 13.00%      | Δ 0.382                         | 4.899                          | 1.421                          | 123.786                       | 16316.690         | 0.000579 | ±0.0000017 | 99.3                  | 9.08                              | 10.9  | ±5.4    |
| 10   | 14.00%      | Δ 0.205                         | 4.303                          | 0.977                          | 83.011                        | 10899.110         | 0.000581 | ±0.0000021 | 99.4                  | 6.09                              | 8.3   | ±4.1    |
| 11   | 16.00%      | Δ 0.258                         | 3.595                          | 1.169                          | 98.449                        | 12911.060         | 0.000582 | ±0.0000019 | 99.4                  | 7.22                              | 11.8  | ±6.3    |
| 12   | 19.00%      | Δ 0.438                         | 8.177                          | 2.035                          | 172.458                       | 22641.900         | 0.000581 | ±0.0000015 | 99.4                  | 12.6                              | 9.1   | ±2.4    |

Sample number: D7, Position:10.17 mm, J value = 0.0005866 ± 0.0000011

| Step | Laser power | <sup>36</sup> Ar <sub>air</sub> | <sup>37</sup> Ar <sub>Ca</sub> | <sup>38</sup> Ar <sub>Cl</sub> | <sup>39</sup> Ar <sub>K</sub> | <sup>40</sup> Ar* | Age (Ma) | ± 2s       | <sup>40</sup> Ar* (%) | <sup>39</sup> Ar <sub>K</sub> (%) | K/Ca | ± 2s   |
|------|-------------|---------------------------------|--------------------------------|--------------------------------|-------------------------------|-------------------|----------|------------|-----------------------|-----------------------------------|------|--------|
| 1    | 5.00%       | 1.690                           | 1.646                          | 0.381                          | 31.634                        | 3597.380          | 0.000671 | ±0.0000045 | 87.7                  | 2.13                              | 8.3  | ±11.7  |
| 2    | 6.30%       | 1.074                           | 0.000                          | 0.774                          | 61.683                        | 7655.560          | 0.000615 | ±0.0000023 | 96                    | 4.15                              | -    | -      |
| 3    | 7.50%       | 1.439                           | 0.579                          | 1.513                          | 126.430                       | 16150.640         | 0.000598 | ±0.0000016 | 97.4                  | 8.51                              | 93.9 | ±427.8 |
| 4    | 8.00%       | Δ 1.050                         | 1.260                          | 1.491                          | 126.787                       | 16426.470         | 0.000589 | ±0.0000015 | 98.1                  | 8.53                              | 43.3 | ±82.4  |
| 5    | 8.60%       | Δ 0.619                         | 0.985                          | 1.391                          | 115.625                       | 15016.420         | 0.000588 | ±0.0000015 | 98.8                  | 7.78                              | 50.5 | ±128.0 |
| 6    | 9.50%       | Δ 0.642                         | 0.692                          | 1.709                          | 141.940                       | 18507.960         | 0.000585 | ±0.0000015 | 99                    | 9.55                              | 88.2 | ±307.9 |
| 7    | 10.50%      | Δ 0.384                         | 1.290                          | 1.554                          | 129.561                       | 16890.560         | 0.000586 | ±0.0000015 | 99.3                  | 8.72                              | 43.2 | ±82.9  |
| 8    | 11.50%      | Δ 0.477                         | 1.377                          | 1.573                          | 133.067                       | 17397.940         | 0.000584 | ±0.0000015 | 99.2                  | 8.96                              | 41.6 | ±79.1  |
| 9    | 13.00%      | Δ 0.452                         | 2.815                          | 1.784                          | 153.724                       | 20021.090         | 0.000586 | ±0.0000014 | 99.3                  | 10.4                              | 23.5 | ±19.8  |
| 10   | 14.00%      | Δ 0.284                         | 2.287                          | 1.264                          | 112.374                       | 14617.770         | 0.000587 | ±0.0000016 | 99.4                  | 7.56                              | 21.1 | ±21.9  |
| 11   | 16.00%      | Δ 0.407                         | 6.181                          | 1.620                          | 138.969                       | 18042.280         | 0.000588 | ±0.0000014 | 99.3                  | 9.35                              | 9.7  | ±3.9   |
| 12   | 19.00%      | Δ 0.693                         | 14.242                         | 2.483                          | 213.769                       | 27788.970         | 0.000587 | ±0.0000014 | 99.3                  | 14.4                              | 6.5  | ±1.2   |

Sample number: D13, Position:29.20 mm, J value = 0.0005952 ± 0.0000015

| Step | Laser power |   | <sup>36</sup> Ar <sub>air</sub> | <sup>37</sup> Ar <sub>Ca</sub> | <sup>38</sup> Ar <sub>Cl</sub> | <sup>39</sup> Ar <sub>K</sub> | <sup>40</sup> Ar* | Age (Ma) | ± 2s       | <sup>40</sup> Ar* (%) | <sup>39</sup> Ar <sub>K</sub> (%) | K/Ca | ± 2s   |
|------|-------------|---|---------------------------------|--------------------------------|--------------------------------|-------------------------------|-------------------|----------|------------|-----------------------|-----------------------------------|------|--------|
| 1    | 5.00%       |   | 2.303                           | 1.961                          | 1.050                          | 85.000                        | 10278.190         | 0.000631 | ±0.0000030 | 93.7                  | 5.2                               | 18.6 | ±36.1  |
| 2    | 6.30%       |   | 1.578                           | 1.877                          | 1.611                          | 133.065                       | 16766.000         | 0.000606 | ±0.0000021 | 97.3                  | 8.15                              | 30.5 | ±60.6  |
| 3    | 7.50%       | Δ | 1.124                           | 2.152                          | 1.909                          | 156.515                       | 20000.280         | 0.000597 | ±0.0000019 | 98.3                  | 9.58                              | 31.3 | ±54.4  |
| 4    | 8.00%       | Δ | 0.466                           | 1.935                          | 1.368                          | 110.144                       | 14120.700         | 0.000595 | ±0.0000023 | 99                    | 6.74                              | 24.5 | ±47.6  |
| 5    | 8.60%       | Δ | 0.406                           | 0.880                          | 1.446                          | 116.276                       | 14943.470         | 0.000594 | ±0.0000022 | 99.2                  | 7.12                              | 56.8 | ±246.0 |
| 6    | 9.50%       | Δ | 0.574                           | 1.111                          | 2.242                          | 183.301                       | 23611.170         | 0.000593 | ±0.0000017 | 99.3                  | 11.2                              | 71.0 | ±230.6 |
| 7    | 10.50%      | Δ | 0.400                           | 1.822                          | 2.105                          | 171.574                       | 22126.460         | 0.000592 | ±0.0000018 | 99.5                  | 10.5                              | 40.5 | ±85.8  |
| 8    | 11.50%      | Δ | 0.369                           | 4.365                          | 1.784                          | 145.962                       | 18837.990         | 0.000591 | ±0.0000019 | 99.4                  | 8.94                              | 14.4 | ±12.7  |
| 9    | 13.00%      | Δ | 0.401                           | 6.756                          | 1.697                          | 137.928                       | 17815.670         | 0.000591 | ±0.0000019 | 99.3                  | 8.44                              | 8.8  | ±5.0   |
| 10   | 14.00%      | Δ | 0.229                           | 3.208                          | 1.190                          | 98.159                        | 12681.490         | 0.000591 | ±0.0000024 | 99.5                  | 6.01                              | 13.2 | ±15.0  |
| 11   | 16.00%      | Δ | 0.178                           | 2.721                          | 0.863                          | 70.780                        | 9157.240          | 0.00059  | ±0.0000031 | 99.4                  | 4.33                              | 11.2 | ±15.2  |
| 12   | 19.00%      | Δ | 0.594                           | 7.695                          | 2.757                          | 224.617                       | 29054.140         | 0.00059  | ±0.0000015 | 99.4                  | 13.8                              | 12.6 | ±5.9   |

Sample number: D16, Position: 39.29 mm, J value = 0.0005906 ± 0.0000018

| Step | Laser power |   | <sup>36</sup> Ar <sub>air</sub> | <sup>37</sup> Ar <sub>Ca</sub> | <sup>38</sup> Ar <sub>Cl</sub> | <sup>39</sup> Ar <sub>K</sub> | <sup>40</sup> Ar* | Age (Ma) | ± 2s       | <sup>40</sup> Ar* (%) | <sup>39</sup> Ar <sub>K</sub> (%) | K/Ca | ± 2s   |
|------|-------------|---|---------------------------------|--------------------------------|--------------------------------|-------------------------------|-------------------|----------|------------|-----------------------|-----------------------------------|------|--------|
| 1    | 5.00%       |   | 2.995                           | 0.000                          | 0.267                          | 17.711                        | 1921.120          | 0.000704 | ±0.0000126 | 68.2                  | 1.37                              | -    | -      |
| 2    | 6.30%       |   | 1.554                           | 0.000                          | 0.759                          | 60.777                        | 7430.020          | 0.000624 | ±0.0000033 | 94.1                  | 4.7                               | -    | -      |
| 3    | 7.50%       | Δ | 1.139                           | 1.134                          | 1.248                          | 98.148                        | 12499.560         | 0.000599 | ±0.0000021 | 97.3                  | 7.58                              | 37.2 | ±73.4  |
| 4    | 8.00%       | Δ | 0.531                           | 0.490                          | 1.019                          | 79.824                        | 10281.130         | 0.000593 | ±0.0000024 | 98.5                  | 6.17                              | 70.1 | ±350.4 |
| 5    | 8.60%       | Δ | 0.428                           | 0.000                          | 1.090                          | 87.518                        | 11317.770         | 0.00059  | ±0.0000022 | 98.9                  | 6.76                              | -    | -      |
| 6    | 9.50%       | Δ | 0.417                           | 1.771                          | 1.322                          | 105.451                       | 13681.710         | 0.000588 | ±0.0000020 | 99.1                  | 8.15                              | 25.6 | ±35.1  |
| 7    | 10.50%      | Δ | 0.345                           | 0.000                          | 1.350                          | 108.049                       | 14010.510         | 0.000589 | ±0.0000019 | 99.3                  | 8.35                              | 75.7 | ±270.3 |
| 8    | 11.50%      | Δ | 0.421                           | 0.991                          | 1.580                          | 126.250                       | 16360.260         | 0.000589 | ±0.0000018 | 99.2                  | 9.75                              | 54.8 | ±139.6 |
| 9    | 13.00%      | Δ | 0.547                           | 4.405                          | 2.034                          | 164.098                       | 21236.050         | 0.00059  | ±0.0000016 | 99.2                  | 12.7                              | 16.0 | ±8.5   |
| 10   | 14.00%      | Δ | 0.274                           | 4.435                          | 1.326                          | 108.839                       | 14082.040         | 0.00059  | ±0.0000019 | 99.4                  | 8.41                              | 10.6 | ±5.4   |
| 11   | 16.00%      | Δ | 0.427                           | 19.341                         | 2.135                          | 167.095                       | 21595.590         | 0.000591 | ±0.0000016 | 99.4                  | 12.9                              | 3.7  | ±0.5   |
| 12   | 19.00%      | Δ | 0.398                           | 10.900                         | 2.077                          | 170.564                       | 22063.510         | 0.00059  | ±0.0000016 | 99.5                  | 13.2                              | 6.7  | ±1.3   |

Sample number: D22, Position: 48.28 mm, J value = 0.0005891± 0.0000011

| Step | Laser power |   | <sup>36</sup> Ar <sub>air</sub> | <sup>37</sup> Ar <sub>Ca</sub> | <sup>38</sup> Ar <sub>Cl</sub> | <sup>39</sup> Ar <sub>K</sub> | <sup>40</sup> Ar* | Age (Ma) | ± 2s       | <sup>40</sup> Ar* (%) | <sup>39</sup> Ar <sub>K</sub> (%) | K/Ca  | ± 2s    |
|------|-------------|---|---------------------------------|--------------------------------|--------------------------------|-------------------------------|-------------------|----------|------------|-----------------------|-----------------------------------|-------|---------|
| 1    | 5.00%       |   | 1.552                           | 0.167                          | 0.173                          | 12.879                        | 1420.270          | 0.000692 | ±0.0000062 | 75.4                  | 0.79                              | 33.1  | ±438.8  |
| 2    | 6.30%       |   | 1.402                           | 0.000                          | 0.646                          | 48.735                        | 6008.580          | 0.000619 | ±0.0000020 | 93.5                  | 3                                 | 52.0  | ±323.5  |
| 3    | 7.50%       |   | 1.661                           | 0.000                          | 1.337                          | 104.241                       | 13110.110         | 0.000607 | ±0.0000015 | 96.3                  | 6.42                              | 64.5  | ±195.3  |
| 4    | 8.00%       |   | 0.866                           | 1.259                          | 1.085                          | 83.201                        | 10606.750         | 0.000599 | ±0.0000015 | 97.6                  | 5.12                              | 28.4  | ±45.7   |
| 5    | 8.60%       | Δ | 0.978                           | 0.000                          | 1.430                          | 109.998                       | 14189.160         | 0.000592 | ±0.0000014 | 98                    | 6.77                              | 96.3  | ±472.1  |
| 6    | 9.50%       | Δ | 0.807                           | 0.112                          | 1.839                          | 141.724                       | 18294.560         | 0.000591 | ±0.0000013 | 98.7                  | 8.73                              | 542.3 | ±9575.1 |
| 7    | 10.50%      | Δ | 0.592                           | 0.892                          | 2.132                          | 165.078                       | 21375.390         | 0.00059  | ±0.0000013 | 99.2                  | 10.2                              | 79.6  | ±187.0  |
| 8    | 11.50%      | Δ | 0.752                           | 1.253                          | 2.455                          | 192.647                       | 24994.990         | 0.000588 | ±0.0000013 | 99.1                  | 11.9                              | 66.1  | ±123.4  |
| 9    | 13.00%      | Δ | 0.913                           | 3.536                          | 2.592                          | 204.338                       | 26554.560         | 0.000587 | ±0.0000013 | 99                    | 12.6                              | 24.8  | ±14.7   |
| 10   | 14.00%      | Δ | 0.444                           | 5.169                          | 1.839                          | 144.506                       | 18772.670         | 0.000588 | ±0.0000013 | 99.3                  | 8.9                               | 12.0  | ±4.8    |
| 11   | 16.00%      | Δ | 0.548                           | 4.635                          | 2.081                          | 166.265                       | 21573.440         | 0.000588 | ±0.0000013 | 99.2                  | 10.2                              | 15.4  | ±6.8    |
| 12   | 19.00%      | Δ | 0.747                           | 10.293                         | 3.184                          | 250.359                       | 32427.260         | 0.000589 | ±0.0000013 | 99.3                  | 15.4                              | 10.5  | ±2.2    |

Sample number: D29, Position: 56.44 mm, J value = 0.0005868 ± 0.0000027

| Step | Laser power |   | <sup>36</sup> Ar <sub>air</sub> | <sup>37</sup> Ar <sub>Ca</sub> | <sup>38</sup> Ar <sub>Cl</sub> | <sup>39</sup> Ar <sub>K</sub> | <sup>40</sup> Ar* | Age (Ma) | ± 2s       | <sup>40</sup> Ar* (%) | <sup>39</sup> Ar <sub>K</sub> (%) | K/Ca | ± 2s   |
|------|-------------|---|---------------------------------|--------------------------------|--------------------------------|-------------------------------|-------------------|----------|------------|-----------------------|-----------------------------------|------|--------|
| 1    | 5.00%       |   | 9.749                           | 4.644                          | 0.560                          | 37.300                        | 4241.660          | 0.000671 | ±0.0000124 | 59.3                  | 3.53                              | 3.5  | ±3.5   |
| 2    | 6.30%       | Δ | 4.755                           | 1.275                          | 0.845                          | 63.673                        | 8113.700          | 0.000599 | ±0.0000056 | 85.1                  | 6.03                              | 21.5 | ±80.4  |
| 3    | 7.50%       | Δ | 4.310                           | 1.596                          | 1.303                          | 101.840                       | 13096.880         | 0.000594 | ±0.0000039 | 91                    | 9.64                              | 27.4 | ±82.2  |
| 4    | 8.00%       | Δ | 1.593                           | 2.665                          | 0.938                          | 64.705                        | 8350.300          | 0.000592 | ±0.0000053 | 94.6                  | 6.13                              | 10.4 | ±18.4  |
| 5    | 8.60%       | Δ | 1.323                           | 2.731                          | 0.983                          | 67.954                        | 8793.860          | 0.00059  | ±0.0000051 | 95.7                  | 6.43                              | 10.7 | ±18.2  |
| 6    | 9.50%       | Δ | 0.956                           | 0.000                          | 0.952                          | 74.152                        | 9666.660          | 0.000586 | ±0.0000045 | 97.1                  | 7.02                              | 14.3 | ±11.7  |
| 7    | 10.50%      | Δ | 0.818                           | 0.679                          | 1.152                          | 88.541                        | 11541.480         | 0.000586 | ±0.0000040 | 97.9                  | 8.38                              | 56.0 | ±385.0 |
| 8    | 11.50%      | Δ | 0.786                           | 2.213                          | 1.114                          | 84.859                        | 11081.800         | 0.000585 | ±0.0000041 | 97.9                  | 8.04                              | 16.5 | ±33.5  |
| 9    | 13.00%      | Δ | 0.932                           | 2.026                          | 1.340                          | 101.119                       | 13216.050         | 0.000584 | ±0.0000037 | 97.9                  | 9.57                              | 21.5 | ±49.2  |
| 10   | 14.00%      | Δ | 0.483                           | 2.905                          | 0.955                          | 73.831                        | 9654.540          | 0.000584 | ±0.0000045 | 98.5                  | 6.99                              | 10.9 | ±17.7  |
| 11   | 16.00%      | Δ | 0.880                           | 0.539                          | 1.225                          | 95.581                        | 12479.010         | 0.000585 | ±0.0000038 | 97.9                  | 9.05                              | 76.2 | ±660.5 |
| 12   | 19.00%      | Δ | 1.510                           | 3.803                          | 2.656                          | 202.519                       | 26477.920         | 0.000584 | ±0.0000028 | 98.3                  | 19.2                              | 22.9 | ±28.7  |

Sample number: E1, Position: 0.61 mm, J value = 0.0005817 ± 0.0000014

| Step | Laser power |   | <sup>36</sup> Ar <sub>air</sub> | <sup>37</sup> Ar <sub>Ca</sub> | <sup>38</sup> Ar <sub>Cl</sub> | <sup>39</sup> Ar <sub>K</sub> | <sup>40</sup> Ar* | Age<br>(Ma) | ± 2s       | <sup>40</sup> Ar*<br>(%) | <sup>39</sup> Ar <sub>K</sub><br>(%) | K/Ca  | ± 2s    |
|------|-------------|---|---------------------------------|--------------------------------|--------------------------------|-------------------------------|-------------------|-------------|------------|--------------------------|--------------------------------------|-------|---------|
| 1    | 5.00%       |   | 3.113                           | 0.246                          | 0.245                          | 19.051                        | 2086.080          | 0.000697    | ±0.0000162 | 69.4                     | 1.51                                 | 33.3  | ±333.0  |
| 2    | 6.30%       |   | 1.479                           | 0.000                          | 0.635                          | 53.894                        | 6777.500          | 0.000607    | ±0.0000055 | 93.9                     | 4.28                                 | 31.8  | ±111.7  |
| 3    | 7.50%       |   | 1.472                           | 0.000                          | 1.316                          | 108.016                       | 13794.240         | 0.000598    | ±0.0000042 | 96.9                     | 8.58                                 | 168.9 | ±1500.8 |
| 4    | 8.00%       |   | 0.847                           | 0.000                          | 1.320                          | 104.953                       | 13623.120         | 0.000588    | ±0.0000041 | 98.2                     | 8.33                                 | 168.9 | ±1500.8 |
| 5    | 8.60%       | Δ | 0.459                           | 0.000                          | 1.197                          | 93.927                        | 12313.030         | 0.000582    | ±0.0000042 | 98.9                     | 7.46                                 | 110.4 | ±710.1  |
| 6    | 9.50%       | Δ | 0.459                           | 0.000                          | 1.409                          | 112.118                       | 14710.380         | 0.000582    | ±0.0000040 | 99.1                     | 8.9                                  | 44.8  | ±110.6  |
| 7    | 10.50%      | Δ | 0.328                           | 0.000                          | 1.396                          | 108.099                       | 14193.890         | 0.000581    | ±0.0000040 | 99.3                     | 8.58                                 | 145.8 | ±1148.1 |
| 8    | 11.50%      | Δ | 0.404                           | 0.830                          | 1.578                          | 120.453                       | 15823.540         | 0.000581    | ±0.0000039 | 99.2                     | 9.56                                 | 62.4  | ±174.7  |
| 9    | 13.00%      | Δ | 0.535                           | 2.167                          | 1.738                          | 135.397                       | 17775.080         | 0.000581    | ±0.0000038 | 99.1                     | 10.8                                 | 26.9  | ±30.0   |
| 10   | 14.00%      | Δ | 0.287                           | 1.478                          | 1.401                          | 110.286                       | 14457.040         | 0.000582    | ±0.0000040 | 99.4                     | 8.76                                 | 32.1  | ±48.7   |
| 11   | 16.00%      | Δ | 0.301                           | 2.641                          | 1.441                          | 111.396                       | 14614.200         | 0.000582    | ±0.0000040 | 99.4                     | 8.84                                 | 18.1  | ±15.3   |
| 12   | 19.00%      | Δ | 0.516                           | 5.305                          | 2.298                          | 181.965                       | 23859.670         | 0.000582    | ±0.0000037 | 99.4                     | 14.5                                 | 14.7  | ±6.5    |

Sample number: E19, Position: 9.71 mm, J value = 0.0005857 ± 0.0000012

| Step | Laser power |   | <sup>36</sup> Ar <sub>air</sub> | <sup>37</sup> Ar <sub>Ca</sub> | <sup>38</sup> Ar <sub>Cl</sub> | <sup>39</sup> Ar <sub>K</sub> | <sup>40</sup> Ar* | Age<br>(Ma) | ± 2s       | <sup>40</sup> Ar*<br>(%) | <sup>39</sup> Ar <sub>K</sub><br>(%) | K/Ca | ± 2s   |
|------|-------------|---|---------------------------------|--------------------------------|--------------------------------|-------------------------------|-------------------|-------------|------------|--------------------------|--------------------------------------|------|--------|
| 1    | 5.00%       |   | 2.348                           | 1.550                          | 0.450                          | 39.698                        | 4738.070          | 0.00064     | ±0.0000054 | 87.2                     | 2.4                                  | 11.0 | ±16.4  |
| 2    | 6.30%       |   | 1.311                           | 0.000                          | 0.921                          | 84.336                        | 10725.080         | 0.0006      | ±0.0000039 | 96.5                     | 5.1                                  | 71.9 | ±350.1 |
| 3    | 7.50%       | Δ | 1.471                           | 0.590                          | 1.526                          | 133.040                       | 17277.720         | 0.000588    | ±0.0000036 | 97.5                     | 8.04                                 | 96.9 | ±382.1 |
| 4    | 8.00%       | Δ | 0.736                           | 2.791                          | 1.229                          | 99.502                        | 12890.310         | 0.000589    | ±0.0000037 | 98.3                     | 6.01                                 | 15.3 | ±11.3  |
| 5    | 8.60%       | Δ | 0.620                           | 1.623                          | 1.353                          | 109.456                       | 14243.740         | 0.000587    | ±0.0000037 | 98.7                     | 6.62                                 | 29.0 | ±34.0  |
| 6    | 9.50%       | Δ | 0.579                           | 0.000                          | 1.577                          | 131.233                       | 17119.780         | 0.000585    | ±0.0000036 | 99                       | 7.93                                 | 66.9 | ±199.2 |
| 7    | 10.50%      | Δ | 0.545                           | 1.215                          | 1.995                          | 166.942                       | 21791.990         | 0.000585    | ±0.0000036 | 99.3                     | 10.1                                 | 59.1 | ±109.0 |
| 8    | 11.50%      | Δ | 0.544                           | 2.214                          | 2.251                          | 188.662                       | 24658.140         | 0.000584    | ±0.0000036 | 99.3                     | 11.4                                 | 36.6 | ±39.6  |
| 9    | 13.00%      | Δ | 0.780                           | 4.555                          | 2.891                          | 242.198                       | 31628.130         | 0.000585    | ±0.0000036 | 99.3                     | 14.6                                 | 22.9 | ±13.0  |
| 10   | 14.00%      | Δ | 0.412                           | 3.928                          | 2.158                          | 179.930                       | 23494.200         | 0.000585    | ±0.0000036 | 99.5                     | 10.9                                 | 19.7 | ±11.5  |
| 11   | 19.00%      | Δ | 0.726                           | 15.414                         | 3.284                          | 279.255                       | 36413.270         | 0.000585    | ±0.0000036 | 99.4                     | 16.9                                 | 7.8  | ±1.3   |

Sample number: E25, Position: 19.14 mm, J value = 0.0005880 ± 0.0000011

| Step | Laser power |   | <sup>36</sup> Ar <sub>air</sub> | <sup>37</sup> Ar <sub>Ca</sub> | <sup>38</sup> Ar <sub>Cl</sub> | <sup>39</sup> Ar <sub>K</sub> | <sup>40</sup> Ar* | Age (Ma) | ± 2s       | <sup>40</sup> Ar* (%) | <sup>39</sup> Ar <sub>K</sub> (%) | K/Ca | ± 2s   |
|------|-------------|---|---------------------------------|--------------------------------|--------------------------------|-------------------------------|-------------------|----------|------------|-----------------------|-----------------------------------|------|--------|
| 1    | 5.00%       |   | 1.887                           | 0.000                          | 1.480                          | 125.499                       | 15495.950         | 0.000618 | ±0.0000038 | 96.5                  | 13.3                              | 35.9 | ±60.0  |
| 2    | 6.30%       | Δ | 0.727                           | 0.000                          | 1.582                          | 136.668                       | 17647.870         | 0.000591 | ±0.0000036 | 98.8                  | 14.5                              | 38.3 | ±59.3  |
| 3    | 7.50%       | Δ | 0.593                           | 0.000                          | 1.714                          | 150.352                       | 19538.180         | 0.000587 | ±0.0000036 | 99.1                  | 15.9                              | 56.4 | ±119.4 |
| 4    | 8.00%       | Δ | 0.221                           | 0.000                          | 0.914                          | 77.928                        | 10157.810         | 0.000586 | ±0.0000036 | 99.4                  | 8.24                              | 53.5 | ±208.2 |
| 5    | 8.60%       | Δ | 0.208                           | 0.552                          | 0.851                          | 73.474                        | 9555.740          | 0.000587 | ±0.0000036 | 99.4                  | 7.77                              | 57.3 | ±245.5 |
| 6    | 9.50%       | Δ | 0.206                           | 2.050                          | 0.761                          | 67.436                        | 8761.530          | 0.000588 | ±0.0000036 | 99.3                  | 7.13                              | 14.1 | ±14.5  |
| 7    | 10.50%      | Δ | 0.232                           | 3.904                          | 0.926                          | 81.247                        | 10535.270         | 0.000589 | ±0.0000036 | 99.3                  | 8.59                              | 8.9  | ±4.9   |
| 8    | 11.50%      | Δ | 0.150                           | 2.121                          | 0.647                          | 54.058                        | 7008.110          | 0.000589 | ±0.0000037 | 99.4                  | 5.72                              | 11.0 | ±11.5  |
| 9    | 13.00%      | Δ | 0.114                           | 0.000                          | 0.498                          | 40.552                        | 5264.430          | 0.000588 | ±0.0000038 | 99.4                  | 4.29                              | 21.3 | ±60.2  |
| 10   | 14.00%      | Δ | 0.069                           | 0.000                          | 0.452                          | 36.498                        | 4738.760          | 0.000588 | ±0.0000038 | 99.6                  | 3.86                              | 15.9 | ±40.8  |
| 11   | 16.00%      | Δ | 0.071                           | 0.000                          | 0.384                          | 31.919                        | 4145.430          | 0.000588 | ±0.0000038 | 99.5                  | 3.38                              | 11.5 | ±25.6  |
| 12   | 19.00%      | Δ | 0.134                           | 1.914                          | 0.841                          | 69.988                        | 9079.390          | 0.000588 | ±0.0000036 | 99.6                  | 7.4                               | 15.7 | ±16.2  |

Sample number: E31, Position: 32.92 mm, J value = 0.0005902 ± 0.0000012

| Step | Laser power |   | <sup>36</sup> Ar <sub>air</sub> | <sup>37</sup> Ar <sub>Ca</sub> | <sup>38</sup> Ar <sub>Cl</sub> | <sup>39</sup> Ar <sub>K</sub> | <sup>40</sup> Ar* | Age (Ma) | ± 2s       | <sup>40</sup> Ar* (%) | <sup>39</sup> Ar <sub>K</sub> (%) | K/Ca  | ± 2s    |
|------|-------------|---|---------------------------------|--------------------------------|--------------------------------|-------------------------------|-------------------|----------|------------|-----------------------|-----------------------------------|-------|---------|
| 1    | 5.00%       |   | 2.603                           | 0.000                          | 0.224                          | 18.947                        | 2087.410          | 0.000693 | ±0.0000124 | 73.1                  | 1.41                              | 3.6   | ±3.4    |
| 2    | 6.30%       |   | 1.698                           | 0.000                          | 0.656                          | 55.533                        | 6892.930          | 0.000615 | ±0.0000047 | 93.2                  | 4.14                              | 14.2  | ±20.2   |
| 3    | 7.50%       | Δ | 1.376                           | 0.000                          | 1.187                          | 97.858                        | 12593.120         | 0.000593 | ±0.0000039 | 96.9                  | 7.3                               | 28.8  | ±43.1   |
| 4    | 8.00%       | Δ | 0.614                           | 0.000                          | 0.883                          | 73.655                        | 9518.040          | 0.000591 | ±0.0000040 | 98.1                  | 5.49                              | 12.3  | ±11.1   |
| 5    | 8.60%       | Δ | 0.448                           | 0.000                          | 0.939                          | 76.957                        | 9965.660          | 0.000589 | ±0.0000040 | 98.7                  | 5.74                              | 14.5  | ±15.6   |
| 6    | 9.50%       | Δ | 0.512                           | 0.263                          | 1.293                          | 105.140                       | 13600.270         | 0.00059  | ±0.0000038 | 98.9                  | 7.84                              | 171.9 | ±1345.7 |
| 7    | 10.50%      | Δ | 0.426                           | 0.719                          | 1.443                          | 114.638                       | 14831.280         | 0.00059  | ±0.0000038 | 99.2                  | 8.55                              | 68.5  | ±197.2  |
| 8    | 11.50%      | Δ | 0.372                           | 2.362                          | 1.414                          | 112.126                       | 14529.890         | 0.000589 | ±0.0000038 | 99.2                  | 8.36                              | 20.4  | ±20.5   |
| 9    | 13.00%      | Δ | 0.389                           | 1.300                          | 1.628                          | 129.900                       | 16836.740         | 0.000589 | ±0.0000037 | 99.3                  | 9.69                              | 43.0  | ±70.8   |
| 10   | 14.00%      | Δ | 0.186                           | 1.034                          | 1.164                          | 93.077                        | 12042.400         | 0.00059  | ±0.0000039 | 99.5                  | 6.94                              | 38.7  | ±70.6   |
| 11   | 16.00%      | Δ | 0.422                           | 4.558                          | 2.024                          | 165.471                       | 21393.850         | 0.00059  | ±0.0000037 | 99.4                  | 12.3                              | 15.6  | ±8.2    |
| 12   | 19.00%      | Δ | 0.891                           | 15.494                         | 3.632                          | 297.545                       | 38463.310         | 0.000591 | ±0.0000036 | 99.3                  | 22.2                              | 8.3   | ±1.3    |



Sample number: E41, Position: 48.73 mm, J value = 0.0005855 ± 0.0000014

| Step | Laser power | <sup>36</sup> Ar <sub>air</sub> | <sup>37</sup> Ar <sub>Ca</sub> | <sup>38</sup> Ar <sub>Cl</sub> | <sup>39</sup> Ar <sub>K</sub> | <sup>40</sup> Ar* | Age<br>(Ma) | ± 2s       | <sup>40</sup> Ar*<br>(%) | <sup>39</sup> Ar <sub>K</sub><br>(%) | K/Ca  | ± 2s    |
|------|-------------|---------------------------------|--------------------------------|--------------------------------|-------------------------------|-------------------|-------------|------------|--------------------------|--------------------------------------|-------|---------|
| 1    | 3.50%       | 0.695                           | 0.000                          | 0.038                          | 4.475                         | 383.200           | 0.000891    | ±0.0000493 | 64.9                     | 0.26                                 | -     | -       |
| 2    | 5.00%       | 1.229                           | 0.000                          | 0.504                          | 42.307                        | 5007.250          | 0.000645    | ±0.0000034 | 93.2                     | 2.44                                 | 40.6  | ±161.1  |
| 3    | 6.20%       | 1.797                           | 0.718                          | 1.296                          | 101.969                       | 12987.930         | 0.000599    | ±0.0000018 | 96                       | 5.87                                 | 61.1  | ±162.7  |
| 4    | 7.20%       | 1.345                           | 0.343                          | 1.973                          | 152.556                       | 19709.070         | 0.000591    | ±0.0000015 | 98                       | 8.78                                 | 191.4 | ±975.0  |
| 5    | 8.00%       | Δ 0.713                         | 0.226                          | 1.934                          | 150.576                       | 19655.090         | 0.000585    | ±0.0000015 | 98.9                     | 8.67                                 | 285.9 | ±2501.4 |
| 6    | 8.80%       | Δ 0.646                         | 0.410                          | 1.758                          | 136.098                       | 17794.510         | 0.000584    | ±0.0000016 | 98.9                     | 7.83                                 | 142.9 | ±727.7  |
| 7    | 9.50%       | Δ 0.367                         | 1.329                          | 1.404                          | 107.571                       | 14050.750         | 0.000584    | ±0.0000016 | 99.2                     | 6.19                                 | 34.8  | ±52.3   |
| 8    | 10.50%      | Δ 0.538                         | 2.628                          | 1.766                          | 133.267                       | 17417.340         | 0.000584    | ±0.0000016 | 99.1                     | 7.67                                 | 21.8  | ±15.5   |
| 9    | 11.50%      | Δ 0.507                         | 2.179                          | 1.907                          | 146.880                       | 19223.600         | 0.000583    | ±0.0000015 | 99.2                     | 8.45                                 | 29.0  | ±24.4   |
| 10   | 13.00%      | Δ 0.766                         | 13.657                         | 2.865                          | 223.547                       | 29164.460         | 0.000585    | ±0.0000014 | 99.2                     | 12.9                                 | 7.0   | ±1.1    |
| 11   | 15.00%      | Δ 0.566                         | 14.560                         | 3.002                          | 233.528                       | 30374.870         | 0.000587    | ±0.0000014 | 99.4                     | 13.4                                 | 6.9   | ±0.9    |
| 12   | 17.00%      | Δ 0.298                         | 8.487                          | 1.560                          | 121.126                       | 15714.230         | 0.000588    | ±0.0000016 | 99.4                     | 6.97                                 | 6.1   | ±1.4    |
| 13   | 20.00%      | Δ 0.206                         | 7.301                          | 0.986                          | 76.679                        | 9921.850          | 0.00059     | ±0.0000019 | 99.4                     | 4.41                                 | 4.5   | ±1.3    |
| 14   | 30.00%      | 0.369                           | 5.035                          | 0.819                          | 64.855                        | 8311.150          | 0.000596    | ±0.0000021 | 98.7                     | 3.73                                 | 5.5   | ±2.3    |
| 15   | 40.00%      | 0.386                           | 5.168                          | 0.530                          | 42.028                        | 5345.680          | 0.0006      | ±0.0000030 | 97.9                     | 2.42                                 | 3.5   | ±1.3    |

Sample number: E47, Position: 56.96 mm, J value = 0.0005817 ± 0.0000007

| Step | Laser power |   | <sup>36</sup> Ar <sub>air</sub> | <sup>37</sup> Ar <sub>Ca</sub> | <sup>38</sup> Ar <sub>Cl</sub> | <sup>39</sup> Ar <sub>K</sub> | <sup>40</sup> Ar* | Age<br>(Ma) | ± 2s       | <sup>40</sup> Ar*<br>(%) | <sup>39</sup> Ar <sub>K</sub><br>(%) | K/Ca | ± 2s   |
|------|-------------|---|---------------------------------|--------------------------------|--------------------------------|-------------------------------|-------------------|-------------|------------|--------------------------|--------------------------------------|------|--------|
| 1    | 2.00%       |   | 0.046                           | 1.740                          | 0.001                          | 0.244                         | 7.390             | 0.002524    | ±0.0048642 | 35                       | 0.01                                 | 0.1  | ±0.1   |
| 2    | 2.50%       |   | 0.066                           | 0.138                          | 0.000                          | 0.265                         | 12.190            | 0.001657    | ±0.0020003 | 38.2                     | 0.02                                 | 0.8  | ±10.6  |
| 3    | 3.00%       |   | 0.181                           | 0.049                          | 0.005                          | 0.792                         | 41.540            | 0.001456    | ±0.0005295 | 43.4                     | 0.05                                 | 6.9  | ±244.6 |
| 4    | 4.00%       |   | 1.086                           | 0.910                          | 0.105                          | 6.077                         | 595.020           | 0.00078     | ±0.0000244 | 64.7                     | 0.35                                 | 2.9  | ±5.5   |
| 5    | 5.00%       |   | 2.103                           | 0.248                          | 0.383                          | 27.405                        | 3436.600          | 0.000609    | ±0.0000042 | 84.6                     | 1.56                                 | 47.5 | ±359.1 |
| 6    | 6.00%       |   | 2.063                           | 3.145                          | 0.747                          | 54.713                        | 7055.970          | 0.000592    | ±0.0000023 | 92                       | 3.11                                 | 7.5  | ±4.7   |
| 7    | 7.00%       |   | 1.268                           | 0.729                          | 0.820                          | 59.184                        | 7655.920          | 0.00059     | ±0.0000021 | 95.3                     | 3.36                                 | 34.9 | ±87.2  |
| 8    | 8.50%       |   | 3.871                           | 3.310                          | 4.832                          | 361.936                       | 47082.120         | 0.000587    | ±0.0000014 | 97.6                     | 20.6                                 | 47.0 | ±26.2  |
| 9    | 9.20%       | Δ | 1.143                           | 3.507                          | 3.478                          | 261.774                       | 34409.990         | 0.000581    | ±0.0000013 | 99                       | 14.9                                 | 32.1 | ±17.5  |
| 10   | 10.00%      | Δ | 0.503                           | 3.167                          | 2.050                          | 153.350                       | 20150.110         | 0.000581    | ±0.0000014 | 99.3                     | 8.72                                 | 20.8 | ±12.7  |
| 11   | 11.00%      | Δ | 0.398                           | 4.634                          | 2.195                          | 167.525                       | 21967.250         | 0.000582    | ±0.0000014 | 99.5                     | 9.52                                 | 15.5 | ±5.8   |
| 12   | 12.00%      | Δ | 0.351                           | 5.548                          | 1.905                          | 143.457                       | 18823.740         | 0.000582    | ±0.0000014 | 99.4                     | 8.15                                 | 11.1 | ±3.9   |
| 13   | 14.00%      | Δ | 0.560                           | 20.334                         | 3.286                          | 246.601                       | 32367.090         | 0.000582    | ±0.0000013 | 99.5                     | 14                                   | 5.2  | ±0.5   |
| 14   | 17.00%      | Δ | 0.299                           | 13.943                         | 1.618                          | 122.521                       | 16034.700         | 0.000583    | ±0.0000015 | 99.4                     | 6.96                                 | 3.8  | ±0.5   |
| 15   | 25.00%      | Δ | 0.290                           | 19.639                         | 1.587                          | 119.218                       | 15620.350         | 0.000583    | ±0.0000015 | 99.4                     | 6.78                                 | 2.6  | ±0.3   |
| 16   | 40.00%      |   | 0.228                           | 7.364                          | 0.488                          | 34.434                        | 4485.370          | 0.000586    | ±0.0000031 | 98.5                     | 1.96                                 | 2.0  | ±0.5   |

Sample number: E55, Position: 64.26 mm, J value = 0.0005776± 0.0000017

| Step | Laser power |   | <sup>36</sup> Ar <sub>air</sub> | <sup>37</sup> Ar <sub>Ca</sub> | <sup>38</sup> Ar <sub>Cl</sub> | <sup>39</sup> Ar <sub>K</sub> | <sup>40</sup> Ar* | Age (Ma) | ± 2s       | <sup>40</sup> Ar* (%) | <sup>39</sup> Ar <sub>K</sub> (%) | K/Ca | ± 2s   |
|------|-------------|---|---------------------------------|--------------------------------|--------------------------------|-------------------------------|-------------------|----------|------------|-----------------------|-----------------------------------|------|--------|
| 1    | 5.00%       |   | 1.353                           | 0.805                          | 0.218                          | 16.708                        | 1916.010          | 0.000666 | ±0.0000083 | 82.6                  | 1.43                              | 8.9  | ±27.5  |
| 2    | 6.30%       |   | 1.316                           | 0.000                          | 0.476                          | 36.928                        | 4741.460          | 0.000595 | ±0.0000039 | 92.3                  | 3.16                              | 19.0 | ±59.2  |
| 3    | 7.50%       |   | 1.211                           | 0.701                          | 0.677                          | 53.512                        | 6949.110          | 0.000588 | ±0.0000032 | 95.1                  | 4.58                              | 32.8 | ±106.3 |
| 4    | 8.00%       |   | 0.802                           | 0.000                          | 0.472                          | 38.141                        | 4964.490          | 0.000586 | ±0.0000037 | 95.4                  | 3.26                              | 10.7 | ±16.7  |
| 5    | 8.60%       |   | 0.728                           | 0.000                          | 0.591                          | 45.062                        | 5886.150          | 0.000584 | ±0.0000034 | 96.4                  | 3.86                              | 10.6 | ±12.6  |
| 6    | 9.50%       |   | 0.766                           | 0.326                          | 0.808                          | 60.454                        | 7918.650          | 0.000583 | ±0.0000030 | 97.2                  | 5.17                              | 79.6 | ±585.7 |
| 7    | 10.50%      | Δ | 0.897                           | 0.621                          | 1.126                          | 84.803                        | 11147.230         | 0.000581 | ±0.0000027 | 97.6                  | 7.26                              | 58.7 | ±204.7 |
| 8    | 11.50%      | Δ | 0.946                           | 0.888                          | 1.480                          | 110.579                       | 14559.510         | 0.00058  | ±0.0000026 | 98.1                  | 9.46                              | 53.5 | ±147.9 |
| 9    | 13.00%      | Δ | 1.095                           | 2.464                          | 2.343                          | 173.321                       | 22896.330         | 0.000578 | ±0.0000024 | 98.6                  | 14.8                              | 30.2 | ±25.5  |
| 10   | 14.00%      | Δ | 0.586                           | 1.580                          | 1.891                          | 139.277                       | 18443.570         | 0.000576 | ±0.0000025 | 99.1                  | 11.9                              | 37.9 | ±55.2  |
| 11   | 16.00%      | Δ | 0.706                           | 4.614                          | 2.463                          | 181.773                       | 24079.040         | 0.000576 | ±0.0000024 | 99.1                  | 15.6                              | 16.9 | ±9.5   |
| 12   | 19.00%      | Δ | 0.880                           | 4.618                          | 3.062                          | 228.010                       | 30249.860         | 0.000575 | ±0.0000024 | 99.1                  | 19.5                              | 21.2 | ±10.5  |

Sample number: F5, Position: 7.91 mm, J value = 0.0005918± 0.0000012

| Step | Laser power |   | <sup>36</sup> Ar <sub>air</sub> | <sup>37</sup> Ar <sub>Ca</sub> | <sup>38</sup> Ar <sub>Cl</sub> | <sup>39</sup> Ar <sub>K</sub> | <sup>40</sup> Ar* | Age (Ma) | ± 2s       | <sup>40</sup> Ar* (%) | <sup>39</sup> Ar <sub>K</sub> (%) | K/Ca  | ± 2s    |
|------|-------------|---|---------------------------------|--------------------------------|--------------------------------|-------------------------------|-------------------|----------|------------|-----------------------|-----------------------------------|-------|---------|
| 1    | 5.00%       |   | 1.715                           | 0.417                          | 0.785                          | 60.744                        | 7365.420          | 0.00063  | ±0.0000045 | 93.5                  | 5.38                              | 62.7  | ±254.1  |
| 2    | 6.30%       | Δ | 1.144                           | 0.000                          | 1.357                          | 112.247                       | 14374.510         | 0.000596 | ±0.0000038 | 97.7                  | 9.95                              | 226.7 | ±2100.4 |
| 3    | 7.50%       | Δ | 0.746                           | 0.346                          | 1.816                          | 151.257                       | 19541.840         | 0.000591 | ±0.0000036 | 98.9                  | 13.4                              | 187.8 | ±1063.0 |
| 4    | 8.30%       | Δ | 0.286                           | 0.933                          | 1.014                          | 85.017                        | 11003.500         | 0.00059  | ±0.0000038 | 99.2                  | 7.53                              | 39.2  | ±73.1   |
| 5    | 9.30%       | Δ | 0.367                           | 1.467                          | 1.259                          | 98.642                        | 12747.920         | 0.000591 | ±0.0000038 | 99.1                  | 8.74                              | 28.9  | ±35.3   |
| 6    | 10.00%      | Δ | 0.206                           | 0.980                          | 0.823                          | 68.039                        | 8796.790          | 0.00059  | ±0.0000039 | 99.3                  | 6.03                              | 29.9  | ±55.8   |
| 7    | 11.00%      | Δ | 0.222                           | 2.671                          | 1.093                          | 88.538                        | 11428.530         | 0.000591 | ±0.0000038 | 99.4                  | 7.85                              | 14.3  | ±10.3   |
| 8    | 12.00%      | Δ | 0.219                           | 2.800                          | 1.115                          | 88.249                        | 11388.150         | 0.000592 | ±0.0000038 | 99.4                  | 7.82                              | 13.6  | ±9.3    |
| 9    | 13.50%      | Δ | 0.177                           | 2.374                          | 0.850                          | 66.684                        | 8589.940          | 0.000593 | ±0.0000040 | 99.4                  | 5.91                              | 12.1  | ±8.9    |
| 10   | 15.00%      | Δ | 0.121                           | 1.963                          | 0.769                          | 61.420                        | 7920.240          | 0.000592 | ±0.0000040 | 99.5                  | 5.44                              | 13.5  | ±13.7   |
| 11   | 17.00%      | Δ | 0.109                           | 2.645                          | 0.718                          | 56.959                        | 7341.740          | 0.000592 | ±0.0000041 | 99.6                  | 5.05                              | 9.3   | ±7.5    |
| 12   | 25.00%      | Δ | 0.369                           | 11.073                         | 2.338                          | 190.502                       | 24549.760         | 0.000592 | ±0.0000036 | 99.5                  | 16.9                              | 7.4   | ±1.3    |

Sample number: F1, Position: 0.66 mm, J value = 0.0005903± 0.0000009

| Step | Laser power |   | <sup>36</sup> Ar <sub>air</sub> | <sup>37</sup> Ar <sub>Ca</sub> | <sup>38</sup> Ar <sub>Cl</sub> | <sup>39</sup> Ar <sub>K</sub> | <sup>40</sup> Ar* | Age<br>(Ma) | ± 2s       | <sup>40</sup> Ar*<br>(%) | <sup>39</sup> Ar <sub>K</sub><br>(%) | K/Ca | ± 2s   |
|------|-------------|---|---------------------------------|--------------------------------|--------------------------------|-------------------------------|-------------------|-------------|------------|--------------------------|--------------------------------------|------|--------|
| 1    | 6.30%       |   | 0.091                           | 0.000                          | 0.195                          | 12.478                        | 1595.171          | 0.000597    | ±0.0000041 | 98.3                     | 3.87                                 | -    | -      |
| 2    | 7.50%       | Δ | 0.196                           | 7.432                          | 0.495                          | 36.024                        | 4655.873          | 0.000591    | ±0.0000019 | 98.8                     | 11.2                                 | 2.1  | ±6.61  |
| 3    | 8.30%       | Δ | 0.259                           | 5.362                          | 0.485                          | 34.906                        | 4501.689          | 0.000592    | ±0.0000019 | 98.3                     | 10.8                                 | 2.8  | ±11.22 |
| 4    | 9.30%       | Δ | 0.435                           | 6.936                          | 0.328                          | 25.350                        | 3281.785          | 0.00059     | ±0.0000024 | 96.2                     | 7.86                                 | 1.6  | ±4.82  |
| 5    | 10.00%      | Δ | 0.206                           | 0.000                          | 0.316                          | 24.775                        | 3205.737          | 0.00059     | ±0.0000023 | 98.1                     | 7.68                                 | 1.8  | ±5.91  |
| 6    | 11.00%      | Δ | 0.108                           | 0.000                          | 0.231                          | 18.267                        | 2368.190          | 0.000589    | ±0.0000028 | 98.6                     | 5.67                                 | 1.8  | ±5.91  |
| 7    | 12.00%      | Δ | 0.129                           | 11.440                         | 0.283                          | 21.322                        | 2763.279          | 0.000589    | ±0.0000026 | 98.6                     | 6.61                                 | 0.8  | ±1.47  |
| 8    | 13.50%      | Δ | 0.096                           | 0.000                          | 0.283                          | 20.262                        | 2611.617          | 0.000592    | ±0.0000027 | 98.9                     | 6.28                                 | 0.9  | ±1.91  |
| 9    | 15.00%      | Δ | 0.124                           | 0.000                          | 0.370                          | 27.322                        | 3525.328          | 0.000592    | ±0.0000022 | 99                       | 8.47                                 | 0.9  | ±1.91  |
| 10   | 15.00%      | Δ | 0.113                           | 0.000                          | 0.309                          | 24.307                        | 3132.583          | 0.000592    | ±0.0000024 | 98.9                     | 7.54                                 | 0.9  | ±1.91  |
| 11   | 17.00%      | Δ | 0.100                           | 0.000                          | 0.208                          | 17.688                        | 2287.873          | 0.00059     | ±0.0000029 | 98.7                     | 5.49                                 | 0.9  | ±1.91  |
| 12   | 20.00%      | Δ | 0.094                           | 0.000                          | 0.207                          | 15.813                        | 2045.534          | 0.00059     | ±0.0000031 | 98.6                     | 4.9                                  | 2.4  | ±17.15 |
| 13   | 25.00%      | Δ | 0.245                           | 8.366                          | 0.214                          | 18.597                        | 2419.465          | 0.000587    | ±0.0000028 | 97.1                     | 5.77                                 | 1.0  | ±2.55  |
| 14   | 30.00%      | Δ | 0.100                           | 9.388                          | 0.208                          | 12.568                        | 1633.013          | 0.000587    | ±0.0000041 | 98.2                     | 3.9                                  | 0.6  | ±1.43  |
| 15   | 40.00%      | Δ | 0.179                           | 8.521                          | 0.132                          | 12.774                        | 1657.887          | 0.000588    | ±0.0000037 | 96.9                     | 3.96                                 | 0.64 | ±1.54  |

Sample number: F11, Position: 16.64 mm, J value = 0.0005902 ± 0.0000013

| Step | Laser power |   | <sup>36</sup> Ar <sub>air</sub> | <sup>37</sup> Ar <sub>Ca</sub> | <sup>38</sup> Ar <sub>Cl</sub> | <sup>39</sup> Ar <sub>K</sub> | <sup>40</sup> Ar* | Age<br>(Ma) | ± 2s       | <sup>40</sup> Ar*<br>(%) | <sup>39</sup> Ar <sub>K</sub><br>(%) | K/Ca   | ± 2s     |
|------|-------------|---|---------------------------------|--------------------------------|--------------------------------|-------------------------------|-------------------|-------------|------------|--------------------------|--------------------------------------|--------|----------|
| 1    | 5.00%       |   | 1.329                           | 1.873                          | 0.567                          | 42.650                        | 5129.880          | 0.000635    | ±0.0000108 | 92.8                     | 3.27                                 | 9.8    | ±8.8     |
| 2    | 6.30%       |   | 1.211                           | 2.054                          | 1.269                          | 100.998                       | 12896.270         | 0.000598    | ±0.0000046 | 97.3                     | 7.75                                 | 21.1   | ±18.8    |
| 3    | 7.50%       | Δ | 0.935                           | 1.206                          | 2.023                          | 162.971                       | 21052.960         | 0.000591    | ±0.0000034 | 98.7                     | 12.5                                 | 58.1   | ±86.4    |
| 4    | 8.30%       | Δ | 0.362                           | 0.053                          | 1.616                          | 129.887                       | 16809.280         | 0.00059     | ±0.0000038 | 99.4                     | 9.97                                 | 1047.1 | ±31122.4 |
| 5    | 9.30%       | Δ | 0.318                           | 0.807                          | 1.563                          | 123.975                       | 16079.320         | 0.000589    | ±0.0000039 | 99.4                     | 9.51                                 | 66.0   | ±163.5   |
| 6    | 10.00%      | Δ | 0.269                           | 0.000                          | 1.144                          | 92.012                        | 11935.780         | 0.000588    | ±0.0000048 | 99.3                     | 7.06                                 | 26.8   | ±32.5    |
| 7    | 11.00%      | Δ | 0.331                           | 0.900                          | 1.333                          | 108.787                       | 14096.540         | 0.000589    | ±0.0000043 | 99.3                     | 8.35                                 | 52.0   | ±88.0    |
| 8    | 12.00%      | Δ | 0.266                           | 2.191                          | 1.243                          | 100.566                       | 13030.860         | 0.000589    | ±0.0000045 | 99.4                     | 7.72                                 | 19.7   | ±15.7    |
| 9    | 13.50%      | Δ | 0.299                           | 5.887                          | 1.646                          | 133.792                       | 17312.920         | 0.00059     | ±0.0000038 | 99.5                     | 10.3                                 | 9.8    | ±2.6     |
| 10   | 15.00%      | Δ | 0.219                           | 4.116                          | 1.578                          | 129.530                       | 16715.460         | 0.000592    | ±0.0000038 | 99.6                     | 9.94                                 | 13.5   | ±5.2     |
| 11   | 17.00%      | Δ | 0.187                           | 8.497                          | 1.403                          | 113.888                       | 14658.210         | 0.000593    | ±0.0000042 | 99.6                     | 8.74                                 | 5.8    | ±1.1     |
| 12   | 20.00%      | Δ | 0.076                           | 6.876                          | 0.780                          | 63.900                        | 8244.110          | 0.000592    | ±0.0000065 | 99.7                     | 4.9                                  | 4.0    | ±1.2     |

Sample number: F18, Position: 25.96 mm, J value = 0.0005896 ± 0.0000016

| Step | Laser power |   | <sup>36</sup> Ar <sub>air</sub> | <sup>37</sup> Ar <sub>Ca</sub> | <sup>38</sup> Ar <sub>Cl</sub> | <sup>39</sup> Ar <sub>K</sub> | <sup>40</sup> Ar* | Age<br>(Ma) | ± 2s       | <sup>40</sup> Ar*<br>(%) | <sup>39</sup> Ar <sub>K</sub><br>(%) | K/Ca | ± 2s   |
|------|-------------|---|---------------------------------|--------------------------------|--------------------------------|-------------------------------|-------------------|-------------|------------|--------------------------|--------------------------------------|------|--------|
| 1    | 5.00%       |   | 2.901                           | 0.633                          | 0.450                          | 33.397                        | 3759.710          | 0.000678    | ±0.0000076 | 81.3                     | 1.94                                 | 22.7 | ±70.5  |
| 2    | 6.30%       |   | 1.373                           | 0.995                          | 1.191                          | 93.078                        | 11671.670         | 0.000609    | ±0.0000040 | 96.6                     | 5.4                                  | 40.2 | ±70.5  |
| 3    | 7.50%       |   | 1.712                           | 0.713                          | 1.890                          | 149.724                       | 18884.440         | 0.000605    | ±0.0000038 | 97.4                     | 8.68                                 | 90.3 | ±231.8 |
| 4    | 8.30%       |   | 1.441                           | 2.234                          | 2.411                          | 187.501                       | 24073.550         | 0.000595    | ±0.0000037 | 98.2                     | 10.9                                 | 36.1 | ±30.7  |
| 5    | 9.30%       | Δ | 1.126                           | 0.980                          | 3.121                          | 243.816                       | 31545.070         | 0.00059     | ±0.0000036 | 98.9                     | 14.1                                 | 107  | ±226.1 |
| 6    | 10.50%      | Δ | 0.979                           | 2.813                          | 3.236                          | 253.753                       | 32883.850         | 0.000589    | ±0.0000036 | 99.1                     | 14.7                                 | 38.8 | ±26.2  |
| 7    | 12.00%      | Δ | 1.201                           | 4.872                          | 4.277                          | 334.889                       | 43415.880         | 0.000589    | ±0.0000036 | 99.2                     | 19.4                                 | 29.6 | ±12.7  |
| 8    | 15.50%      | Δ | 0.829                           | 9.558                          | 3.427                          | 268.885                       | 34813.630         | 0.00059     | ±0.0000036 | 99.3                     | 15.6                                 | 12.1 | ±2.3   |
| 9    | 18.00%      | Δ | 0.457                           | 8.179                          | 1.997                          | 158.922                       | 20530.940         | 0.000591    | ±0.0000037 | 99.3                     | 9.22                                 | 8.4  | ±2.0   |

Sample number: F24, Position: 35.09 mm, J value = 0.0005881 ± 0.0000022

| Step | Laser power |   | <sup>36</sup> Ar <sub>air</sub> | <sup>37</sup> Ar <sub>Ca</sub> | <sup>38</sup> Ar <sub>Cl</sub> | <sup>39</sup> Ar <sub>K</sub> | <sup>40</sup> Ar* | Age (Ma) | ± 2s       | <sup>40</sup> Ar* (%) | <sup>39</sup> Ar <sub>K</sub> (%) | K/Ca | ± 2s   |
|------|-------------|---|---------------------------------|--------------------------------|--------------------------------|-------------------------------|-------------------|----------|------------|-----------------------|-----------------------------------|------|--------|
| 1    | 5.00%       |   | 2.772                           | 1.290                          | 0.871                          | 66.069                        | 8026.960          | 0.000628 | ±0.0000045 | 90.6                  | 4.27                              | 22.0 | ±32.4  |
| 2    | 6.30%       |   | 1.485                           | 1.503                          | 1.641                          | 123.916                       | 15951.360         | 0.000593 | ±0.0000037 | 97.3                  | 8                                 | 35.4 | ±46.1  |
| 3    | 7.50%       | Δ | 1.125                           | 1.232                          | 2.348                          | 179.098                       | 23285.890         | 0.000587 | ±0.0000036 | 98.6                  | 11.6                              | 62.5 | ±95.1  |
| 4    | 8.30%       | Δ | 0.618                           | 0.986                          | 1.764                          | 133.640                       | 17423.680         | 0.000585 | ±0.0000037 | 98.9                  | 8.63                              | 58.3 | ±112.2 |
| 5    | 9.30%       | Δ | 0.432                           | 1.181                          | 1.751                          | 137.050                       | 17865.960         | 0.000586 | ±0.0000036 | 99.3                  | 8.85                              | 49.9 | ±85.4  |
| 6    | 10.50%      | Δ | 0.487                           | 3.813                          | 2.020                          | 154.173                       | 20102.000         | 0.000585 | ±0.0000036 | 99.3                  | 9.95                              | 17.4 | ±8.0   |
| 7    | 12.00%      | Δ | 0.439                           | 5.424                          | 2.086                          | 158.648                       | 20622.700         | 0.000587 | ±0.0000036 | 99.4                  | 10.2                              | 12.6 | ±4.9   |
| 8    | 14.00%      | Δ | 0.541                           | 7.948                          | 2.383                          | 183.525                       | 23822.550         | 0.000588 | ±0.0000036 | 99.3                  | 11.9                              | 9.9  | ±2.5   |
| 9    | 15.50%      | Δ | 0.511                           | 8.121                          | 2.540                          | 192.391                       | 24968.200         | 0.000588 | ±0.0000036 | 99.4                  | 12.4                              | 10.2 | ±2.4   |
| 10   | 18.00%      | Δ | 0.406                           | 6.426                          | 1.862                          | 143.919                       | 18433.690         | 0.000596 | ±0.0000037 | 99.3                  | 9.29                              | 9.6  | ±3.2   |
| 11   | 30.00%      | Δ | 0.184                           | 9.800                          | 0.981                          | 76.320                        | 9865.400          | 0.000591 | ±0.0000038 | 99.4                  | 4.93                              | 3.3  | ±0.7   |

Sample number: F30, Position: 44.26 mm, J value = 0.0005831 ± 0.0000018

| Step | Laser power |   | <sup>36</sup> Ar <sub>air</sub> | <sup>37</sup> Ar <sub>Ca</sub> | <sup>38</sup> Ar <sub>Cl</sub> | <sup>39</sup> Ar <sub>K</sub> | <sup>40</sup> Ar* | Age (Ma) | ± 2s       | <sup>40</sup> Ar* (%) | <sup>39</sup> Ar <sub>K</sub> (%) | K/Ca | ± 2s   |
|------|-------------|---|---------------------------------|--------------------------------|--------------------------------|-------------------------------|-------------------|----------|------------|-----------------------|-----------------------------------|------|--------|
| 1    | 5.00%       |   | 2.657                           | 1.209                          | 1.328                          | 95.225                        | 11494.530         | 0.000632 | ±0.0000040 | 93.5                  | 5.8                               | 33.9 | ±57.0  |
| 2    | 6.50%       | Δ | 1.834                           | 2.565                          | 3.249                          | 240.168                       | 31201.180         | 0.000588 | ±0.0000036 | 98.3                  | 14.6                              | 40.3 | ±33.8  |
| 3    | 7.50%       | Δ | 0.684                           | 1.176                          | 2.667                          | 198.544                       | 26082.810         | 0.000581 | ±0.0000035 | 99.2                  | 12.1                              | 72.6 | ±130.9 |
| 4    | 8.30%       | Δ | 0.487                           | 2.807                          | 1.969                          | 146.220                       | 19241.770         | 0.00058  | ±0.0000036 | 99.2                  | 8.91                              | 22.4 | ±16.2  |
| 5    | 9.30%       | Δ | 0.552                           | 3.863                          | 2.239                          | 165.244                       | 21788.020         | 0.000579 | ±0.0000035 | 99.2                  | 10.1                              | 18.4 | ±9.5   |
| 6    | 10.50%      | Δ | 0.634                           | 4.791                          | 2.532                          | 187.686                       | 24684.850         | 0.00058  | ±0.0000035 | 99.2                  | 11.4                              | 16.8 | ±7.0   |
| 7    | 12.00%      | Δ | 0.758                           | 10.843                         | 3.103                          | 230.232                       | 30138.540         | 0.000583 | ±0.0000035 | 99.2                  | 14                                | 9.1  | ±1.9   |
| 8    | 14.00%      | Δ | 0.381                           | 9.672                          | 1.664                          | 120.431                       | 15711.140         | 0.000585 | ±0.0000036 | 99.3                  | 7.33                              | 5.4  | ±1.2   |
| 9    | 15.50%      | Δ | 0.073                           | 4.559                          | 0.891                          | 63.028                        | 8222.380          | 0.000585 | ±0.0000036 | 99.7                  | 3.84                              | 5.9  | ±3.1   |
| 10   | 18.00%      | Δ | 0.090                           | 7.791                          | 0.952                          | 67.908                        | 8850.400          | 0.000586 | ±0.0000036 | 99.7                  | 4.14                              | 3.7  | ±1.0   |
| 11   | 30.00%      | Δ | 0.216                           | 25.046                         | 1.723                          | 127.184                       | 16623.270         | 0.000584 | ±0.0000035 | 99.6                  | 7.75                              | 2.2  | ±0.2   |

Sample number: F34, Position: 50.64 mm, J value = 0.0005806 ± 0.0000016

| Step | Laser power | <sup>36</sup> Ar <sub>air</sub> | <sup>37</sup> Ar <sub>Ca</sub> | <sup>38</sup> Ar <sub>Cl</sub> | <sup>39</sup> Ar <sub>K</sub> | <sup>40</sup> Ar* | Age (Ma) | ± 2s       | <sup>40</sup> Ar* (%) | <sup>39</sup> Ar <sub>K</sub> (%) | K/Ca  | ± 2s   |
|------|-------------|---------------------------------|--------------------------------|--------------------------------|-------------------------------|-------------------|----------|------------|-----------------------|-----------------------------------|-------|--------|
| 1    | 5.00%       | 3.252                           | 0.357                          | 0.411                          | 28.814                        | 3085.570          | 0.000713 | ±0.0000113 | 76.1                  | 2.14                              | 34.7  | ±184.1 |
| 2    | 6.50%       | 1.976                           | 0.906                          | 1.066                          | 77.102                        | 9768.700          | 0.000602 | ±0.0000045 | 94.3                  | 5.73                              | 36.6  | ±71.1  |
| 3    | 7.50%       | 1.213                           | 0.000                          | 1.235                          | 90.403                        | 11719.480         | 0.000589 | ±0.0000041 | 97                    | 6.72                              | 89.0  | ±434.6 |
| 4    | 8.30%       | Δ 1.241                         | 0.349                          | 1.675                          | 122.419                       | 16002.440         | 0.000584 | ±0.0000038 | 97.7                  | 9.1                               | 151.0 | ±865.9 |
| 5    | 9.30%       | Δ 1.003                         | 0.797                          | 2.232                          | 163.271                       | 21448.820         | 0.000581 | ±0.0000037 | 98.6                  | 12.1                              | 88.1  | ±221.5 |
| 6    | 10.50%      | Δ 0.826                         | 1.881                          | 2.473                          | 179.502                       | 23662.230         | 0.000579 | ±0.0000037 | 99                    | 13.3                              | 41.0  | ±38.4  |
| 7    | 12.00%      | Δ 0.831                         | 2.239                          | 2.828                          | 204.701                       | 27022.320         | 0.000578 | ±0.0000036 | 99.1                  | 15.2                              | 39.3  | ±30.3  |
| 8    | 14.00%      | Δ 0.989                         | 3.246                          | 2.858                          | 211.189                       | 27871.200         | 0.000578 | ±0.0000036 | 98.9                  | 15.7                              | 28.0  | ±15.8  |
| 9    | 25.00%      | Δ 0.266                         | 7.245                          | 1.208                          | 85.813                        | 11254.320         | 0.000582 | ±0.0000041 | 99.3                  | 6.38                              | 5.1   | ±1.4   |
| 10   | 40.00%      | Δ 0.679                         | 22.751                         | 2.440                          | 182.540                       | 23943.820         | 0.000582 | ±0.0000036 | 99.2                  | 13.6                              | 3.5   | ±0.3   |

Sample number: F41, Position: 62.28 mm, J value = 0.0005725 ± 0.0000016

| Step | Laser power | <sup>36</sup> Ar <sub>air</sub> | <sup>37</sup> Ar <sub>Ca</sub> | <sup>38</sup> Ar <sub>Cl</sub> | <sup>39</sup> Ar <sub>K</sub> | <sup>40</sup> Ar* | Age (Ma) | ± 2s       | <sup>40</sup> Ar* (%) | <sup>39</sup> Ar <sub>K</sub> (%) | K/Ca  | ± 2s    |
|------|-------------|---------------------------------|--------------------------------|--------------------------------|-------------------------------|-------------------|----------|------------|-----------------------|-----------------------------------|-------|---------|
| 1    | 5.00%       | 2.902                           | 2.313                          | 1.147                          | 80.508                        | 9653.710          | 0.000637 | ±0.0000042 | 91.8                  | 4.85                              | 15.0  | ±15.5   |
| 2    | 6.50%       | 1.939                           | 1.489                          | 2.360                          | 166.491                       | 21687.900         | 0.000586 | ±0.0000021 | 97.4                  | 10                                | 48.1  | ±61.6   |
| 3    | 7.50%       | Δ 1.354                         | 1.442                          | 2.897                          | 204.046                       | 27066.520         | 0.000575 | ±0.0000018 | 98.5                  | 12.3                              | 60.9  | ±85.1   |
| 4    | 8.30%       | Δ 0.982                         | 2.504                          | 2.840                          | 198.885                       | 26555.330         | 0.000572 | ±0.0000019 | 98.9                  | 12                                | 34.2  | ±27.4   |
| 5    | 9.00%       | Δ 0.444                         | 0.000                          | 1.891                          | 131.348                       | 17557.540         | 0.000571 | ±0.0000023 | 99.2                  | 7.92                              | 29.7  | ±22.3   |
| 6    | 10.00%      | Δ 0.438                         | 0.142                          | 1.867                          | 131.000                       | 17527.920         | 0.000571 | ±0.0000024 | 99.3                  | 7.9                               | 396.8 | ±6257.4 |
| 7    | 11.50%      | Δ 0.513                         | 2.414                          | 2.197                          | 153.162                       | 20504.700         | 0.00057  | ±0.0000021 | 99.3                  | 9.23                              | 27.3  | ±23.7   |
| 8    | 13.00%      | Δ 0.581                         | 2.491                          | 2.248                          | 155.558                       | 20824.440         | 0.00057  | ±0.0000021 | 99.2                  | 9.38                              | 26.9  | ±20.9   |
| 9    | 15.00%      | Δ 0.444                         | 4.835                          | 2.225                          | 157.526                       | 21027.970         | 0.000572 | ±0.0000021 | 99.4                  | 9.5                               | 14.0  | ±6.6    |
| 10   | 30.00%      | Δ 0.720                         | 32.054                         | 3.637                          | 258.994                       | 34361.670         | 0.000575 | ±0.0000016 | 99.4                  | 15.6                              | 3.5   | ±0.2    |
| 11   | 40.00%      | 0.524                           | 0.880                          | 0.299                          | 21.457                        | 2758.750          | 0.000594 | ±0.0000130 | 94.6                  | 1.29                              | 10.5  | ±24.6   |

Sample number: H1, Position: 0.50 mm, J value = 0.0005725 ± 0.0000016

| Step | Laser power |   | <sup>36</sup> Ar <sub>air</sub> | <sup>37</sup> Ar <sub>Ca</sub> | <sup>38</sup> Ar <sub>Cl</sub> | <sup>39</sup> Ar <sub>K</sub> | <sup>40</sup> Ar* | Age (Ma) | ± 2s       | <sup>40</sup> Ar* (%) | <sup>39</sup> Ar <sub>K</sub> (%) | K/Ca | ± 2s   |
|------|-------------|---|---------------------------------|--------------------------------|--------------------------------|-------------------------------|-------------------|----------|------------|-----------------------|-----------------------------------|------|--------|
| 1    | 5.00%       |   | 2.430                           | 2.880                          | 1.469                          | 119.229                       | 15399.590         | 0.000591 | ±0.0000027 | 95.5                  | 7.9                               | 17.8 | ±11.8  |
| 2    | 6.30%       | Δ | 1.256                           | 2.618                          | 2.111                          | 173.677                       | 23553.380         | 0.000563 | ±0.0000019 | 98.4                  | 11.5                              | 28.5 | ±24.9  |
| 3    | 7.50%       | Δ | 0.823                           | 2.925                          | 2.409                          | 195.452                       | 26712.010         | 0.000559 | ±0.0000018 | 99.1                  | 12.9                              | 28.7 | ±16.2  |
| 4    | 8.00%       | Δ | 0.328                           | 1.028                          | 1.360                          | 108.980                       | 14894.980         | 0.000559 | ±0.0000026 | 99.3                  | 7.22                              | 45.6 | ±77.0  |
| 5    | 8.60%       | Δ | 0.242                           | 0.647                          | 1.046                          | 84.936                        | 11589.630         | 0.000559 | ±0.0000031 | 99.4                  | 5.63                              | 56.5 | ±158.6 |
| 6    | 9.50%       | Δ | 0.323                           | 2.323                          | 1.335                          | 105.388                       | 14385.780         | 0.000559 | ±0.0000026 | 99.3                  | 6.98                              | 19.5 | ±19.1  |
| 7    | 10.50%      | Δ | 0.295                           | 1.573                          | 1.435                          | 120.003                       | 16379.530         | 0.000559 | ±0.0000024 | 99.5                  | 7.95                              | 32.8 | ±41.5  |
| 8    | 11.50%      | Δ | 0.311                           | 3.572                          | 1.539                          | 127.761                       | 17433.370         | 0.000559 | ±0.0000023 | 99.5                  | 8.46                              | 15.4 | ±9.4   |
| 9    | 13.00%      | Δ | 0.297                           | 5.970                          | 1.478                          | 120.317                       | 16386.850         | 0.00056  | ±0.0000024 | 99.5                  | 7.97                              | 8.7  | ±3.0   |
| 10   | 15.00%      | Δ | 0.232                           | 10.103                         | 1.470                          | 122.244                       | 16631.290         | 0.000561 | ±0.0000024 | 99.6                  | 8.1                               | 5.2  | ±1.1   |
| 11   | 17.00%      | Δ | 0.234                           | 15.660                         | 1.360                          | 118.701                       | 16151.780         | 0.000561 | ±0.0000024 | 99.6                  | 7.86                              | 3.3  | ±0.4   |
| 12   | 20.00%      | Δ | 0.210                           | 16.779                         | 1.341                          | 113.204                       | 15360.190         | 0.000563 | ±0.0000025 | 99.6                  | 7.5                               | 2.9  | ±0.3   |

Sample number: H7, Position: 14.38 mm, J value = 0.0005676 ± 0.0000006

| Step | Laser power |   | <sup>36</sup> Ar <sub>air</sub> | <sup>37</sup> Ar <sub>Ca</sub> | <sup>38</sup> Ar <sub>Cl</sub> | <sup>39</sup> Ar <sub>K</sub> | <sup>40</sup> Ar* | Age (Ma) | ± 2s       | <sup>40</sup> Ar* (%) | <sup>39</sup> Ar <sub>K</sub> (%) | K/Ca | ± 2s   |
|------|-------------|---|---------------------------------|--------------------------------|--------------------------------|-------------------------------|-------------------|----------|------------|-----------------------|-----------------------------------|------|--------|
| 1    | 5.00%       |   | 1.850                           | 1.712                          | 0.472                          | 36.153                        | 4399.500          | 0.000627 | ±0.0000033 | 88.9                  | 2.26                              | 9.1  | ±11.4  |
| 2    | 6.30%       |   | 1.157                           | 0.000                          | 0.838                          | 67.759                        | 8828.310          | 0.000586 | ±0.0000019 | 96.3                  | 4.24                              | -    | -      |
| 3    | 7.50%       |   | 1.515                           | 0.920                          | 1.429                          | 113.444                       | 14933.920         | 0.00058  | ±0.0000016 | 97.1                  | 7.11                              | 53.0 | ±127.3 |
| 4    | 8.00%       |   | 0.962                           | 1.723                          | 1.343                          | 107.972                       | 14363.950         | 0.000574 | ±0.0000016 | 98.1                  | 6.76                              | 26.9 | ±31.4  |
| 5    | 8.60%       | Δ | 0.756                           | 1.075                          | 1.533                          | 125.588                       | 16837.170         | 0.000569 | ±0.0000014 | 98.7                  | 7.87                              | 50.3 | ±99.8  |
| 6    | 9.50%       | Δ | 0.930                           | 2.370                          | 2.251                          | 179.783                       | 24187.450         | 0.000567 | ±0.0000013 | 98.9                  | 11.3                              | 32.6 | ±28.3  |
| 7    | 10.50%      | Δ | 0.707                           | 4.756                          | 2.392                          | 196.287                       | 26380.750         | 0.000568 | ±0.0000013 | 99.2                  | 12.3                              | 17.7 | ±7.1   |
| 8    | 11.50%      | Δ | 0.745                           | 2.628                          | 2.364                          | 197.729                       | 26623.180         | 0.000567 | ±0.0000013 | 99.2                  | 12.4                              | 32.4 | ±28.9  |
| 9    | 13.00%      | Δ | 1.105                           | 7.215                          | 3.243                          | 265.769                       | 35755.680         | 0.000567 | ±0.0000013 | 99.1                  | 16.7                              | 15.8 | ±5.4   |
| 10   | 17.00%      | Δ | 0.736                           | 18.282                         | 2.471                          | 203.712                       | 27401.350         | 0.000568 | ±0.0000013 | 99.2                  | 12.8                              | 4.8  | ±0.6   |
| 11   | 20.00%      | Δ | 0.308                           | 12.763                         | 1.185                          | 102.043                       | 13730.040         | 0.000567 | ±0.0000015 | 99.3                  | 6.39                              | 3.4  | ±0.5   |



Sample number: H12, Position: 25.31 mm, J value = 0.0005703 ± 0.0000005

| Step | Laser power |   | <sup>36</sup> Ar <sub>air</sub> | <sup>37</sup> Ar <sub>Ca</sub> | <sup>38</sup> Ar <sub>Cl</sub> | <sup>39</sup> Ar <sub>K</sub> | <sup>40</sup> Ar* | Age (Ma) | ± 2s       | <sup>40</sup> Ar* (%) | <sup>39</sup> Ar <sub>K</sub> (%) | K/Ca  | ± 2s     |
|------|-------------|---|---------------------------------|--------------------------------|--------------------------------|-------------------------------|-------------------|----------|------------|-----------------------|-----------------------------------|-------|----------|
| 1    | 5.00%       |   | 3.915                           | 3.369                          | 0.709                          | 50.534                        | 6160.720          | 0.000626 | ±0.0000023 | 84.2                  | 2.69                              | 6.4   | ±5.9     |
| 2    | 6.30%       |   | 1.794                           | 3.727                          | 1.271                          | 101.753                       | 13454.980         | 0.000577 | ±0.0000015 | 96.2                  | 5.42                              | 11.7  | ±10.2    |
| 3    | 7.50%       | Δ | 1.753                           | 2.387                          | 2.048                          | 163.751                       | 21851.010         | 0.000572 | ±0.0000012 | 97.7                  | 8.72                              | 29.5  | ±39.0    |
| 4    | 8.00%       | Δ | 0.754                           | 0.894                          | 1.591                          | 128.068                       | 17103.800         | 0.000572 | ±0.0000013 | 98.7                  | 6.82                              | 61.6  | ±216.2   |
| 5    | 8.60%       | Δ | 0.801                           | 0.826                          | 1.746                          | 140.583                       | 18824.100         | 0.00057  | ±0.0000013 | 98.8                  | 7.49                              | 73.2  | ±276.4   |
| 6    | 9.50%       | Δ | 0.615                           | 1.627                          | 1.771                          | 143.320                       | 19210.100         | 0.00057  | ±0.0000013 | 99.1                  | 7.63                              | 37.9  | ±73.4    |
| 7    | 10.50%      | Δ | 0.479                           | 1.923                          | 1.841                          | 149.909                       | 20072.800         | 0.00057  | ±0.0000012 | 99.3                  | 7.98                              | 33.5  | ±58.2    |
| 8    | 11.50%      | Δ | 0.505                           | 0.085                          | 1.810                          | 146.320                       | 19577.050         | 0.000571 | ±0.0000013 | 99.2                  | 7.79                              | 743.7 | ±27663.6 |
| 9    | 13.00%      | Δ | 0.715                           | 3.299                          | 2.447                          | 197.392                       | 26424.290         | 0.00057  | ±0.0000012 | 99.2                  | 10.5                              | 25.7  | ±23.2    |
| 10   | 14.00%      | Δ | 0.281                           | 0.944                          | 1.540                          | 123.349                       | 16497.760         | 0.000571 | ±0.0000013 | 99.5                  | 6.57                              | 56.2  | ±190.6   |
| 11   | 16.00%      | Δ | 0.558                           | 7.701                          | 2.652                          | 214.499                       | 28750.420         | 0.00057  | ±0.0000012 | 99.4                  | 11.4                              | 12.0  | ±5.1     |
| 12   | 19.00%      | Δ | 0.927                           | 20.308                         | 3.975                          | 318.252                       | 42649.550         | 0.00057  | ±0.0000012 | 99.4                  | 17                                | 6.7   | ±1.1     |

Sample number: H18, Position: 34.22 mm, J value = 0.0005715 ± 0.0000006

| Step | Laser power |   | <sup>36</sup> Ar <sub>air</sub> | <sup>37</sup> Ar <sub>Ca</sub> | <sup>38</sup> Ar <sub>Cl</sub> | <sup>39</sup> Ar <sub>K</sub> | <sup>40</sup> Ar* | Age (Ma) | ± 2s       | <sup>40</sup> Ar* (%) | <sup>39</sup> Ar <sub>K</sub> (%) | K/Ca  | ± 2s     |
|------|-------------|---|---------------------------------|--------------------------------|--------------------------------|-------------------------------|-------------------|----------|------------|-----------------------|-----------------------------------|-------|----------|
| 1    | 5.00%       |   | 1.733                           | 4.351                          | 0.450                          | 36.034                        | 4318.300          | 0.000637 | ±0.0000050 | 89.4                  | 3.52                              | 3.6   | ±2.1     |
| 2    | 6.30%       |   | 1.358                           | 3.188                          | 1.066                          | 82.459                        | 10853.100         | 0.00058  | ±0.0000021 | 96.4                  | 8.07                              | 11.1  | ±8.3     |
| 3    | 7.50%       | Δ | 0.961                           | 2.800                          | 1.616                          | 126.180                       | 16852.350         | 0.000572 | ±0.0000016 | 98.3                  | 12.3                              | 19.4  | ±17.3    |
| 4    | 8.00%       | Δ | 0.352                           | 0.968                          | 1.008                          | 79.557                        | 10624.810         | 0.000572 | ±0.0000021 | 99                    | 7.78                              | 35.3  | ±91.3    |
| 5    | 8.60%       | Δ | 0.246                           | 2.385                          | 0.929                          | 71.177                        | 9503.910          | 0.000572 | ±0.0000023 | 99.2                  | 6.96                              | 12.8  | ±14.5    |
| 6    | 9.50%       | Δ | 0.268                           | 0.039                          | 0.962                          | 77.156                        | 10300.380         | 0.000572 | ±0.0000022 | 99.2                  | 7.55                              | 844.5 | ±52479.6 |
| 7    | 10.50%      | Δ | 0.221                           | 0.000                          | 0.923                          | 75.173                        | 10034.890         | 0.000572 | ±0.0000022 | 99.3                  | 7.35                              | 28.6  | ±52.3    |
| 8    | 11.50%      | Δ | 0.202                           | 1.636                          | 0.890                          | 73.141                        | 9773.100          | 0.000571 | ±0.0000022 | 99.4                  | 7.15                              | 19.2  | ±29.5    |
| 9    | 13.00%      | Δ | 0.238                           | 2.882                          | 1.132                          | 88.640                        | 11821.100         | 0.000572 | ±0.0000020 | 99.4                  | 8.67                              | 13.2  | ±11.0    |
| 10   | 14.00%      | Δ | 0.188                           | 4.324                          | 1.010                          | 78.994                        | 10552.160         | 0.000571 | ±0.0000021 | 99.5                  | 7.73                              | 7.9   | ±4.5     |
| 11   | 16.00%      | Δ | 0.243                           | 6.108                          | 1.304                          | 103.574                       | 13835.380         | 0.000571 | ±0.0000018 | 99.5                  | 10.1                              | 7.3   | ±2.8     |
| 12   | 19.00%      | Δ | 0.335                           | 9.284                          | 1.662                          | 130.157                       | 17398.200         | 0.000571 | ±0.0000016 | 99.4                  | 12.7                              | 6.0   | ±1.7     |

Sample number: H32, Position: 52.29 mm, J value = 0.0005660 ± 0.0000009

| Step | Laser power |   | <sup>36</sup> Ar <sub>air</sub> | <sup>37</sup> Ar <sub>Ca</sub> | <sup>38</sup> Ar <sub>Cl</sub> | <sup>39</sup> Ar <sub>K</sub> | <sup>40</sup> Ar* | Age (Ma) | ± 2s       | <sup>40</sup> Ar* (%) | <sup>39</sup> Ar <sub>K</sub> (%) | K/Ca  | ± 2s     |
|------|-------------|---|---------------------------------|--------------------------------|--------------------------------|-------------------------------|-------------------|----------|------------|-----------------------|-----------------------------------|-------|----------|
| 1    | 5.00%       |   | 2.041                           | 2.081                          | 0.549                          | 41.545                        | 4919.540          | 0.000645 | ±0.0000064 | 89                    | 2.46                              | 8.6   | ±16.2    |
| 2    | 6.30%       |   | 2.122                           | 2.116                          | 2.084                          | 156.290                       | 20581.490         | 0.00058  | ±0.0000018 | 97                    | 9.25                              | 31.8  | ±59.3    |
| 3    | 7.50%       | Δ | 1.418                           | 3.686                          | 3.180                          | 239.168                       | 32188.560         | 0.000567 | ±0.0000015 | 98.7                  | 14.2                              | 27.9  | ±30.6    |
| 4    | 8.00%       | Δ | 0.450                           | 2.666                          | 1.964                          | 146.905                       | 19839.810         | 0.000565 | ±0.0000018 | 99.3                  | 8.7                               | 23.7  | ±34.6    |
| 5    | 8.60%       | Δ | 0.456                           | 0.743                          | 1.816                          | 136.401                       | 18459.270         | 0.000564 | ±0.0000019 | 99.3                  | 8.07                              | 79.0  | ±418.7   |
| 6    | 9.50%       | Δ | 0.489                           | 1.374                          | 1.778                          | 133.918                       | 18115.040         | 0.000564 | ±0.0000019 | 99.2                  | 7.93                              | 41.9  | ±118.3   |
| 7    | 10.50%      | Δ | 0.411                           | 2.031                          | 1.903                          | 143.706                       | 19433.930         | 0.000564 | ±0.0000018 | 99.4                  | 8.51                              | 30.4  | ±57.5    |
| 8    | 11.50%      | Δ | 0.460                           | 0.152                          | 2.269                          | 173.228                       | 23367.140         | 0.000566 | ±0.0000017 | 99.4                  | 10.3                              | 489.9 | ±13129.1 |
| 9    | 13.00%      | Δ | 0.555                           | 10.079                         | 3.138                          | 237.350                       | 31969.800         | 0.000567 | ±0.0000015 | 99.5                  | 14.1                              | 10.1  | ±3.9     |
| 10   | 14.00%      | Δ | 0.153                           | 8.664                          | 1.371                          | 107.595                       | 14460.020         | 0.000568 | ±0.0000022 | 99.7                  | 6.37                              | 5.3   | ±2.4     |
| 11   | 16.00%      | Δ | 0.096                           | 8.567                          | 1.010                          | 77.963                        | 10477.060         | 0.000568 | ±0.0000028 | 99.7                  | 4.62                              | 3.9   | ±1.8     |
| 12   | 19.00%      | Δ | 0.151                           | 13.031                         | 1.257                          | 95.239                        | 12805.720         | 0.000568 | ±0.0000024 | 99.6                  | 5.64                              | 3.1   | ±0.9     |

Sample number: H36, Position: 59.92 mm, J value = 0.0005608 ± 0.0000005

| Step | Laser power |   | <sup>36</sup> Ar <sub>air</sub> | <sup>37</sup> Ar <sub>Ca</sub> | <sup>38</sup> Ar <sub>Cl</sub> | <sup>39</sup> Ar <sub>K</sub> | <sup>40</sup> Ar* | Age (Ma) | ± 2s       | <sup>40</sup> Ar* (%) | <sup>39</sup> Ar <sub>K</sub> (%) | K/Ca | ± 2s   |
|------|-------------|---|---------------------------------|--------------------------------|--------------------------------|-------------------------------|-------------------|----------|------------|-----------------------|-----------------------------------|------|--------|
| 1    | 5.00%       |   | 9.083                           | 2.649                          | 0.830                          | 55.008                        | 6617.410          | 0.000622 | ±0.0000046 | 70.9                  | 3.23                              | 8.9  | ±6.3   |
| 2    | 6.30%       |   | 1.967                           | 3.266                          | 1.692                          | 123.350                       | 16411.810         | 0.000562 | ±0.0000018 | 96.5                  | 7.25                              | 16.2 | ±9.8   |
| 3    | 7.50%       |   | 1.763                           | 2.126                          | 2.572                          | 188.247                       | 25488.390         | 0.000553 | ±0.0000015 | 98                    | 11.1                              | 38.1 | ±33.0  |
| 4    | 8.00%       | Δ | 0.766                           | 0.718                          | 1.879                          | 138.115                       | 18800.720         | 0.00055  | ±0.0000016 | 98.8                  | 8.12                              | 82.7 | ±239.5 |
| 5    | 8.60%       | Δ | 0.653                           | 2.668                          | 2.062                          | 149.940                       | 20435.350         | 0.000549 | ±0.0000015 | 99                    | 8.82                              | 24.2 | ±16.2  |
| 6    | 9.50%       | Δ | 0.552                           | 1.421                          | 2.262                          | 163.828                       | 22309.000         | 0.000549 | ±0.0000015 | 99.3                  | 9.63                              | 49.6 | ±67.4  |
| 7    | 10.50%      | Δ | 0.534                           | 2.390                          | 2.382                          | 178.030                       | 24267.580         | 0.000549 | ±0.0000015 | 99.3                  | 10.5                              | 32.0 | ±25.5  |
| 8    | 11.50%      | Δ | 0.546                           | 3.606                          | 2.360                          | 173.957                       | 23674.240         | 0.00055  | ±0.0000014 | 99.3                  | 10.2                              | 20.7 | ±11.9  |
| 9    | 13.00%      | Δ | 0.651                           | 9.535                          | 2.852                          | 211.809                       | 28810.490         | 0.00055  | ±0.0000014 | 99.3                  | 12.5                              | 9.6  | ±1.9   |
| 10   | 14.00%      | Δ | 0.197                           | 3.932                          | 1.360                          | 99.197                        | 13486.430         | 0.00055  | ±0.0000019 | 99.6                  | 5.83                              | 10.8 | ±5.0   |
| 11   | 16.00%      | Δ | 0.191                           | 5.835                          | 1.250                          | 88.639                        | 12053.630         | 0.00055  | ±0.0000020 | 99.5                  | 5.21                              | 6.5  | ±2.3   |
| 12   | 19.00%      | Δ | 0.237                           | 12.199                         | 1.791                          | 130.845                       | 17783.500         | 0.00055  | ±0.0000016 | 99.6                  | 7.69                              | 4.6  | ±0.7   |

Sample number: H43, Position: 64.59 mm, J value = 0.0005576± 0.0000007

| Step | Laser power | <sup>36</sup> Ar <sub>air</sub> | <sup>37</sup> Ar <sub>Ca</sub> | <sup>38</sup> Ar <sub>Cl</sub> | <sup>39</sup> Ar <sub>K</sub> | <sup>40</sup> Ar* | Age (Ma)  | ± 2s       | <sup>40</sup> Ar* (%) | <sup>39</sup> Ar <sub>K</sub> (%) | K/Ca | ± 2s   |         |
|------|-------------|---------------------------------|--------------------------------|--------------------------------|-------------------------------|-------------------|-----------|------------|-----------------------|-----------------------------------|------|--------|---------|
| 1    | 5.00%       | 1.958                           | 0.891                          | 0.253                          | 20.209                        | 2407.160          | 0.000641  | ±0.0000050 | 80.5                  | 1.5                               | 9.8  | ±25.3  |         |
| 2    | 6.30%       | 1.194                           | 0.000                          | 0.573                          | 44.604                        | 5881.530          | 0.000579  | ±0.0000028 | 94.3                  | 3.31                              | 61.5 | ±388.2 |         |
| 3    | 7.50%       | 1.407                           | 0.000                          | 1.173                          | 86.179                        | 11517.350         | 0.000571  | ±0.0000025 | 96.5                  | 6.4                               | 61.5 | ±388.2 |         |
| 4    | 8.00%       | 0.756                           | 1.678                          | 1.193                          | 87.385                        | 11830.860         | 0.000564  | ±0.0000024 | 98.1                  | 6.49                              | 22.4 | ±28.8  |         |
| 5    | 8.60%       | Δ                               | 0.532                          | 1.768                          | 1.380                         | 98.243            | 13401.500 | 0.00056    | ±0.0000024            | 98.8                              | 7.3  | 23.9   | ±26.9   |
| 6    | 9.50%       | Δ                               | 0.533                          | 0.219                          | 1.767                         | 128.200           | 17555.840 | 0.000557   | ±0.0000023            | 99.1                              | 9.53 | 251.2  | ±2589.2 |
| 7    | 10.50%      | Δ                               | 0.424                          | 0.486                          | 1.837                         | 133.916           | 18380.110 | 0.000556   | ±0.0000023            | 99.3                              | 9.95 | 118.6  | ±502.7  |
| 8    | 11.50%      | Δ                               | 0.349                          | 3.303                          | 1.574                         | 114.174           | 15658.650 | 0.000557   | ±0.0000023            | 99.3                              | 8.48 | 14.9   | ±8.5    |
| 9    | 13.00%      | Δ                               | 0.518                          | 5.495                          | 2.005                         | 146.204           | 20061.680 | 0.000556   | ±0.0000023            | 99.2                              | 10.9 | 11.4   | ±4.6    |
| 10   | 14.00%      | Δ                               | 0.328                          | 3.708                          | 1.524                         | 111.776           | 15302.960 | 0.000558   | ±0.0000023            | 99.4                              | 8.31 | 13.0   | ±7.2    |
| 11   | 16.00%      | Δ                               | 0.477                          | 5.358                          | 2.420                         | 180.793           | 24718.400 | 0.000558   | ±0.0000023            | 99.4                              | 13.4 | 14.5   | ±5.7    |
| 12   | 19.00%      | Δ                               | 0.474                          | 9.706                          | 2.598                         | 194.098           | 26484.220 | 0.000559   | ±0.0000023            | 99.5                              | 14.4 | 8.6    | ±1.9    |
