# Supplementary material for: Sample neutron irradiation with the Min Jiang Testing Reactor (MJTR): implications for high-precision 40Ar/39Ar dating
Source: Royal Society of Chemistry journal article supplement (doi:10.1039/d3ja00048f), 2023-01-01
Supplement: d3ja00048f2.pdf [file d3ja00048f2.pdf]

Table S3 Raw data for  $^{40}\text{Ar}/^{39}\text{Ar}$  dating result of DRA-1

DRA-1,Sandine,No.D19J=0.0059075±0.00000059

| Step | Laserpower | $^{36}\text{Ar}_{\text{air}}$ | $^{37}\text{Ar}_{\text{Ca}}$ | $^{38}\text{Ar}_{\text{Cl}}$ | $^{39}\text{Ar}_{\text{K}}$ | $^{40}\text{Ar}^*$ | Age      | ±2s    | $^{40}\text{Ar}^*$ | $^{39}\text{Ar}_{\text{K}}$ | K/Ca  | ±2s   | Ratioanderrorforinverseisochron |           |            |                                 |             |
|------|------------|-------------------------------|------------------------------|------------------------------|-----------------------------|--------------------|----------|--------|--------------------|-----------------------------|-------|-------|---------------------------------|-----------|------------|---------------------------------|-------------|
|      |            |                               |                              |                              |                             |                    |          |        |                    |                             |       |       | (Ma)                            | (%)       | (%)        | $^{39}\text{Ar}/^{40}\text{Ar}$ | ±2s         |
| 1    | 4.0%       |                               | 0.515                        | 5.506                        | 0.255                       | 10.932             | 257.885  | 24.965 | ±6.38              | 62.64                       | 0.50  | 0.85  | ±2.34                           | 0.0265659 | ±0.0065060 | 0.0012504                       | ±0.0001611  |
| 2    | 6.0%       | Δ                             | 0.444                        | 11.162                       | 0.998                       | 75.890             | 1803.868 | 25.155 | ±0.90              | 93.10                       | 3.50  | 2.92  | ±4.33                           | 0.0391899 | ±0.0013888 | 0.0002294                       | ±0.0000229  |
| 3    | 7.5%       | Δ                             | 0.830                        | 15.988                       | 2.740                       | 216.735            | 5137.618 | 25.086 | ±0.34              | 95.34                       | 9.99  | 5.83  | ±5.60                           | 0.0402453 | ±0.0005101 | 0.0001541                       | ±0.0000143  |
| 4    | 8.5%       | Δ                             | 0.700                        | 9.801                        | 2.838                       | 238.868            | 5650.720 | 25.036 | ±0.29              | 96.37                       | 11.01 | 10.48 | ±19.00                          | 0.0407638 | ±0.0004694 | 0.0001195                       | ±0.0000082  |
| 5    | 9.5%       | Δ                             | 0.322                        | 19.062                       | 2.111                       | 190.046            | 4503.116 | 25.076 | ±0.36              | 97.85                       | 8.76  | 4.29  | ±4.22                           | 0.0413205 | ±0.0005952 | 0.0000701                       | ±0.0000081  |
| 6    | 10.3%      | Δ                             | 0.207                        | 26.431                       | 1.928                       | 150.212            | 3562.561 | 25.099 | ±0.45              | 98.24                       | 6.92  | 2.44  | ±1.44                           | 0.0414466 | ±0.0007466 | 0.0000570                       | ±0.0000065  |
| 7    | 11.1%      | Δ                             | 0.100                        | 18.771                       | 1.080                       | 84.413             | 1999.187 | 25.064 | ±0.81              | 98.46                       | 3.89  | 1.93  | ±1.25                           | 0.0415992 | ±0.0013299 | 0.00004952                      | ±0.00001897 |
| 8    | 12.0%      | Δ                             | 0.181                        | 18.674                       | 1.572                       | 124.246            | 2948.414 | 25.114 | ±0.55              | 98.14                       | 5.73  | 2.86  | ±1.82                           | 0.0413823 | ±0.0008986 | 0.00006021                      | ±0.00001316 |
| 9    | 12.8%      | Δ                             | 0.219                        | 0.000                        | 0.920                       | 104.121            | 2490.507 | 25.312 | ±0.66              | 97.38                       | 4.80  | 3.70  | ±4.93                           | 0.0407367 | ±0.0010511 | 0.00008577                      | ±0.00001408 |
| 10   | 13.6%      | Δ                             | 0.188                        | 6.464                        | 0.978                       | 79.920             | 1899.017 | 25.146 | ±0.86              | 97.07                       | 3.68  | 5.32  | ±13.37                          | 0.0408755 | ±0.0013852 | 0.00009626                      | ±0.00001889 |
| 11   | 14.5%      | Δ                             | 0.235                        | 18.057                       | 0.953                       | 62.108             | 1477.449 | 25.175 | ±1.11              | 95.41                       | 2.86  | 1.48  | ±1.34                           | 0.0401295 | ±0.0017404 | 0.00015199                      | ±0.00003245 |
| 12   | 15.5%      | Δ                             | 0.123                        | 5.759                        | 0.952                       | 77.350             | 1828.287 | 25.015 | ±0.88              | 97.97                       | 3.57  | 5.78  | ±14.64                          | 0.0414742 | ±0.0014454 | 0.00006595                      | ±0.00001766 |
| 13   | 17.0%      | Δ                             | 0.093                        | 14.070                       | 1.127                       | 92.004             | 2186.207 | 25.147 | ±0.74              | 98.69                       | 4.24  | 2.81  | ±2.42                           | 0.0415565 | ±0.0012192 | 0.00004198                      | ±0.00001329 |
| 14   | 18.5%      | Δ                             | 0.178                        | 0.000                        | 1.084                       | 88.863             | 2106.084 | 25.082 | ±0.77              | 97.48                       | 4.10  | 5.99  | ±16.03                          | 0.0411535 | ±0.0012471 | 0.00008255                      | ±0.00001913 |
| 15   | 20.0%      | Δ                             | 0.208                        | 0.000                        | 1.080                       | 91.253             | 2163.738 | 25.093 | ±0.75              | 97.15                       | 4.21  | 8.50  | ±18.55                          | 0.0409987 | ±0.0012073 | 0.00009334                      | ±0.00002306 |
| 16   | 22.0%      | 4                             | 0.288                        | 0.000                        | 1.689                       | 134.176            | 3175.660 | 25.048 | ±0.51              | 97.30                       | 6.19  | 30.59 | ±258.11                         | 0.0411371 | ±0.0008266 | 0.00008833                      | ±0.00001341 |
| 17   | 25.0%      | 4                             | 0.509                        | 7.125                        | 2.268                       | 195.019            | 4623.671 | 25.091 | ±0.36              | 96.76                       | 8.99  | 11.77 | ±25.02                          | 0.0408361 | ±0.0005669 | 0.00010659                      | ±0.00001052 |
| 18   | 30.0%      | Δ                             | 0.331                        | 0.000                        | 1.759                       | 152.972            | 3632.858 | 25.133 | ±0.45              | 97.29                       | 7.05  | 22.80 | ±107.15                         | 0.0409927 | ±0.0007231 | 0.00008871                      | ±0.00001250 |

DRA-1,Sandine,No.E38J=0.0058722±0.00000059

| Step | Laserpower | <sup>36</sup> Ar <sub>air</sub> | <sup>37</sup> Ar <sub>Ca</sub> | <sup>38</sup> Ar <sub>Cl</sub> | <sup>39</sup> Ar <sub>K</sub> | <sup>40</sup> Ar* | Age<br>(Ma) | ±2s   | <sup>40</sup> Ar*<br>(%) | <sup>39</sup> Ar <sub>K</sub><br>(%) | K/Ca  | ±2s     | Ratioanderrorforinverseisochron    |            |                                    |             |
|------|------------|---------------------------------|--------------------------------|--------------------------------|-------------------------------|-------------------|-------------|-------|--------------------------|--------------------------------------|-------|---------|------------------------------------|------------|------------------------------------|-------------|
|      |            |                                 |                                |                                |                               |                   |             |       |                          |                                      |       |         | <sup>39</sup> Ar/ <sup>40</sup> Ar | ±2s        | <sup>36</sup> Ar/ <sup>40</sup> Ar | ±2s         |
| 1    | 4.0%       | 0.515                           | 5.506                          | 0.255                          | 10.932                        | 257.885           | 24.965      | ±6.38 | 62.64                    | 0.50                                 | 0.85  | ±2.34   | 0.0265659                          | ±0.0065060 | 0.0012504                          | ±0.0001611  |
| 2    | 6.0%       | Δ 0.444                         | 11.162                         | 0.998                          | 75.890                        | 1803.868          | 25.155      | ±0.90 | 93.10                    | 3.50                                 | 2.92  | ±4.33   | 0.0391899                          | ±0.0013888 | 0.0002294                          | ±0.0000229  |
| 3    | 7.5%       | Δ 0.830                         | 15.988                         | 2.740                          | 216.735                       | 5137.618          | 25.086      | ±0.34 | 95.34                    | 9.99                                 | 5.83  | ±5.60   | 0.0402453                          | ±0.0005101 | 0.0001541                          | ±0.0000143  |
| 4    | 8.5%       | Δ 0.700                         | 9.801                          | 2.838                          | 238.868                       | 5650.720          | 25.036      | ±0.29 | 96.37                    | 11.01                                | 10.48 | ±19.00  | 0.0407638                          | ±0.0004694 | 0.0001195                          | ±0.0000082  |
| 5    | 9.5%       | Δ 0.322                         | 19.062                         | 2.111                          | 190.046                       | 4503.116          | 25.076      | ±0.36 | 97.85                    | 8.76                                 | 4.29  | ±4.22   | 0.0413205                          | ±0.0005952 | 0.0000701                          | ±0.0000081  |
| 6    | 10.3%      | Δ 0.207                         | 26.431                         | 1.928                          | 150.212                       | 3562.561          | 25.099      | ±0.45 | 98.24                    | 6.92                                 | 2.44  | ±1.44   | 0.0414466                          | ±0.0007466 | 0.0000570                          | ±0.0000065  |
| 7    | 11.1%      | Δ 0.100                         | 18.771                         | 1.080                          | 84.413                        | 1999.187          | 25.064      | ±0.81 | 98.46                    | 3.89                                 | 1.93  | ±1.25   | 0.0415992                          | ±0.0013299 | 0.0000495                          | ±0.0000190  |
| 8    | 12.0%      | Δ 0.181                         | 18.674                         | 1.572                          | 124.246                       | 2948.414          | 25.114      | ±0.55 | 98.14                    | 5.73                                 | 2.86  | ±1.82   | 0.0413823                          | ±0.0008986 | 0.0000602                          | ±0.0000132  |
| 9    | 12.8%      | Δ 0.219                         | 0.000                          | 0.920                          | 104.121                       | 2490.507          | 25.312      | ±0.66 | 97.38                    | 4.80                                 | 3.70  | ±4.93   | 0.0407367                          | ±0.0010511 | 0.00008577                         | ±0.00001408 |
| 10   | 13.6%      | Δ 0.188                         | 6.464                          | 0.978                          | 79.920                        | 1899.017          | 25.146      | ±0.86 | 97.07                    | 3.68                                 | 5.32  | ±13.37  | 0.0408755                          | ±0.0013852 | 0.00009626                         | ±0.00001889 |
| 11   | 14.5%      | Δ 0.235                         | 18.057                         | 0.953                          | 62.108                        | 1477.449          | 25.175      | ±1.11 | 95.41                    | 2.86                                 | 1.48  | ±1.34   | 0.0401295                          | ±0.0017404 | 0.00015199                         | ±0.00003245 |
| 12   | 15.5%      | Δ 0.123                         | 5.759                          | 0.952                          | 77.350                        | 1828.287          | 25.015      | ±0.88 | 97.97                    | 3.57                                 | 5.78  | ±14.64  | 0.0414742                          | ±0.0014454 | 0.00006595                         | ±0.00001766 |
| 13   | 17.0%      | Δ 0.093                         | 14.070                         | 1.127                          | 92.004                        | 2186.207          | 25.147      | ±0.74 | 98.69                    | 4.24                                 | 2.81  | ±2.42   | 0.0415565                          | ±0.0012192 | 0.00004198                         | ±0.00001329 |
| 14   | 18.5%      | Δ 0.178                         | 0.000                          | 1.084                          | 88.863                        | 2106.084          | 25.082      | ±0.77 | 97.48                    | 4.10                                 | 5.99  | ±16.03  | 0.0411535                          | ±0.0012471 | 0.00008255                         | ±0.00001913 |
| 15   | 20.0%      | Δ 0.208                         | 0.000                          | 1.080                          | 91.253                        | 2163.738          | 25.093      | ±0.75 | 97.15                    | 4.21                                 | 8.50  | ±18.55  | 0.0409987                          | ±0.0012073 | 0.00009334                         | ±0.00002306 |
| 16   | 22.0%      | Δ 0.288                         | 0.000                          | 1.689                          | 134.176                       | 3175.660          | 25.048      | ±0.51 | 97.30                    | 6.19                                 | 30.59 | ±258.11 | 0.0411371                          | ±0.0008266 | 0.00008833                         | ±0.00001341 |
| 17   | 25.0%      | Δ 0.509                         | 7.125                          | 2.268                          | 195.019                       | 4623.671          | 25.091      | ±0.36 | 96.76                    | 8.99                                 | 11.77 | ±25.02  | 0.0408361                          | ±0.0005669 | 0.00010659                         | ±0.00001052 |
| 18   | 30.0%      | Δ 0.331                         | 0.000                          | 1.759                          | 152.972                       | 3632.858          | 25.133      | ±0.45 | 97.29                    | 7.05                                 | 22.80 | ±107.15 | 0.0409927                          | ±0.0007231 | 0.00008871                         | ±0.00001250 |

DRA-1,Sandine,No.E51J=0.0058072±0.00000058

| Step | Laserpower | <sup>36</sup> Ar <sub>air</sub> | <sup>37</sup> Ar <sub>Ca</sub> | <sup>38</sup> Ar <sub>Cl</sub> | <sup>39</sup> Ar <sub>K</sub> | <sup>40</sup> Ar* | Age<br>(Ma) | ±2s    | <sup>40</sup> Ar*<br>(%) | <sup>39</sup> Ar <sub>K</sub><br>(%) | K/Ca  | ±2s     | Ratioanderrorforinverseisochron    |            |                                    |             |
|------|------------|---------------------------------|--------------------------------|--------------------------------|-------------------------------|-------------------|-------------|--------|--------------------------|--------------------------------------|-------|---------|------------------------------------|------------|------------------------------------|-------------|
|      |            |                                 |                                |                                |                               |                   |             |        |                          |                                      |       |         | <sup>39</sup> Ar/ <sup>40</sup> Ar | ±2s        | <sup>36</sup> Ar/ <sup>40</sup> Ar | ±2s         |
| 1    | 3.5%       | 6.713                           | 9.842                          | 0.074                          | 8.526                         | 266.846           | 32.515      | ±18.99 | 11.75                    | 0.27                                 | 0.37  | ±1.38   | 0.0037539                          | ±0.0020679 | 0.0029559                          | ±0.0000798  |
| 2    | 6.0%       | Δ 4.548                         | 23.244                         | 2.623                          | 209.316                       | 5063.711          | 25.183      | ±0.61  | 78.82                    | 6.60                                 | 3.87  | ±5.36   | 0.0325959                          | ±0.0007602 | 0.0007082                          | ±0.0000192  |
| 3    | 7.0%       | Δ 2.137                         | 0.000                          | 3.888                          | 303.947                       | 7323.607          | 25.083      | ±0.42  | 91.93                    | 9.59                                 | 14.07 | ±56.86  | 0.0381762                          | ±0.0006357 | 0.0002684                          | ±0.0000093  |
| 4    | 8.0%       | Δ 2.939                         | 22.437                         | 6.988                          | 538.623                       | 12940.287         | 25.010      | ±0.27  | 93.60                    | 16.99                                | 10.32 | ±13.55  | 0.0389804                          | ±0.0004141 | 0.0002127                          | ±0.0000066  |
| 5    | 8.5%       | Δ 2.126                         | 0.000                          | 5.717                          | 441.591                       | 10604.770         | 25.000      | ±0.31  | 94.30                    | 13.93                                | 18.18 | ±66.53  | 0.0392896                          | ±0.0004817 | 0.0001891                          | ±0.00000667 |
| 6    | 9.0%       | Δ 3.309                         | 0.000                          | 5.186                          | 415.172                       | 9945.016          | 24.937      | ±0.33  | 90.91                    | 13.09                                | 12.25 | ±29.32  | 0.0379745                          | ±0.0004888 | 0.00030265                         | ±0.00000950 |
| 7    | 9.5%       | Δ 7.984                         | 0.000                          | 4.708                          | 379.839                       | 9208.505          | 25.236      | ±0.39  | 79.40                    | 11.98                                | 12.25 | ±29.32  | 0.0327668                          | ±0.0004517 | 0.00068874                         | ±0.00001793 |
| 8    | 10.5%      | Δ 0.948                         | 3.904                          | 1.848                          | 152.343                       | 3740.928          | 25.559      | ±0.81  | 92.92                    | 4.80                                 | 16.78 | ±143.47 | 0.0378597                          | ±0.0011941 | 0.00023552                         | ±0.00001500 |
| 9    | 12.0%      | Δ 1.486                         | 0.000                          | 1.654                          | 139.083                       | 3408.349          | 25.507      | ±0.88  | 88.44                    | 4.39                                 | 19.52 | ±220.94 | 0.0361074                          | ±0.0012440 | 0.00038571                         | ±0.00001582 |
| 10   | 13.5%      | Δ 1.504                         | 13.541                         | 2.697                          | 205.398                       | 4979.323          | 25.235      | ±0.60  | 91.68                    | 6.48                                 | 6.52  | ±13.42  | 0.0378385                          | ±0.0008987 | 0.00027702                         | ±0.00001099 |
| 11   | 14.2%      | Δ 0.500                         | 7.446                          | 0.945                          | 76.191                        | 1866.932          | 25.505      | ±1.59  | 92.55                    | 2.40                                 | 4.40  | ±17.62  | 0.0377903                          | ±0.0023505 | 0.00024791                         | ±0.00002454 |
| 12   | 18.5%      | Δ 1.277                         | 15.398                         | 1.259                          | 103.721                       | 2538.352          | 25.473      | ±1.17  | 86.89                    | 3.27                                 | 2.90  | ±6.61   | 0.0355240                          | ±0.0016285 | 0.00043752                         | ±0.00001974 |
| 13   | 21.0%      | Δ 1.278                         | 2.161                          | 2.570                          | 196.974                       | 4790.339          | 25.315      | ±0.63  | 92.57                    | 6.21                                 | 39.20 | ±580.59 | 0.0380858                          | ±0.0009408 | 0.00024708                         | ±0.00001060 |

DRA-1,Sandine,No.F40J=0.0057374±0.00000057

| Step | Laserpower | <sup>36</sup> Ar <sub>air</sub> | <sup>37</sup> Ar <sub>Ca</sub> | <sup>38</sup> Ar <sub>Cl</sub> | <sup>39</sup> Ar <sub>K</sub> | <sup>40</sup> Ar* | Age   | ±2s   | <sup>40</sup> Ar* | <sup>39</sup> Ar <sub>K</sub> | K/Ca  | ±2s     | Ratioanderrorforinverseisochron    |            |                                    |             |
|------|------------|---------------------------------|--------------------------------|--------------------------------|-------------------------------|-------------------|-------|-------|-------------------|-------------------------------|-------|---------|------------------------------------|------------|------------------------------------|-------------|
|      |            |                                 |                                |                                |                               |                   |       |       |                   |                               |       |         | <sup>39</sup> Ar/ <sup>40</sup> Ar | ±2s        | <sup>36</sup> Ar/ <sup>40</sup> Ar | ±2s         |
| 1    | 4.0%       | 0.407                           | 11.448                         | 0.185                          | 4.237                         | 115.436           | 27.98 | ±5.16 | 48.70             | 0.30                          | 0.16  | ±0.30   | 0.0178787                          | 0.0014629  | 0.00171796                         | ±0.00027145 |
| 2    | 6.0%       | Δ 0.289                         | 1.960                          | 0.618                          | 42.858                        | 1041.771          | 24.98 | ±0.53 | 92.29             | 3.04                          | 9.40  | ±92.70  | 0.0379885                          | 0.0003521  | 0.00025657                         | ±0.00005953 |
| 3    | 7.5%       | Δ 0.730                         | 3.080                          | 2.400                          | 174.504                       | 4241.430          | 24.98 | ±0.16 | 95.06             | 12.38                         | 24.36 | ±144.43 | 0.0391312                          | 0.0001306  | 0.00016376                         | ±0.00001774 |
| 4    | 8.5%       | Δ 0.677                         | 1.890                          | 2.194                          | 174.100                       | 4220.960          | 24.92 | ±0.14 | 95.37             | 12.35                         | 39.61 | ±424.93 | 0.0393606                          | 0.0001240  | 0.00015315                         | ±0.00001570 |
| 5    | 9.5%       | Δ 0.334                         | 3.269                          | 1.630                          | 120.586                       | 2925.469          | 24.94 | ±0.16 | 96.64             | 8.55                          | 15.86 | ±99.36  | 0.0398594                          | ±0.0001612 | 0.00011050                         | ±0.00001570 |
| 6    | 10.3%      | Δ 0.267                         | 17.327                         | 1.800                          | 125.578                       | 3049.232          | 24.96 | ±0.17 | 97.39             | 8.91                          | 3.12  | ±4.28   | 0.0401329                          | ±0.0001531 | 0.00008545                         | ±0.00001869 |
| 7    | 11.1%      | Δ 0.120                         | 0.000                          | 1.431                          | 103.303                       | 2512.858          | 25.00 | ±0.19 | 98.54             | 7.33                          | 9.65  | ±42.09  | 0.0405334                          | ±0.0001865 | 0.00004697                         | ±0.00002092 |
| 8    | 12.0%      | Δ 0.282                         | 5.601                          | 1.242                          | 98.944                        | 2396.359          | 24.89 | ±0.20 | 96.55             | 7.02                          | 7.60  | ±27.90  | 0.0398880                          | ±0.0001738 | 0.00011367                         | ±0.00002206 |
| 9    | 12.8%      | Δ 0.142                         | 0.000                          | 1.218                          | 81.045                        | 1979.452          | 25.10 | ±0.24 | 97.85             | 5.75                          | 5.25  | ±17.51  | 0.0400857                          | ±0.0002328 | 0.00007016                         | ±0.00002571 |
| 10   | 13.6%      | Δ 0.134                         | 3.992                          | 1.035                          | 63.340                        | 1539.722          | 24.99 | ±0.30 | 97.41             | 4.49                          | 6.82  | ±34.98  | 0.0400941                          | ±0.0002455 | 0.00008491                         | ±0.00003459 |
| 11   | 14.5%      | Δ 0.110                         | 3.480                          | 0.185                          | 33.795                        | 832.186           | 25.31 | ±0.49 | 96.16             | 2.40                          | 4.18  | ±23.34  | 0.0390710                          | ±0.0004074 | 0.00012690                         | ±0.00005271 |
| 12   | 15.5%      | Δ 0.051                         | 15.828                         | 0.574                          | 41.325                        | 1003.701          | 24.96 | ±0.42 | 98.44             | 2.93                          | 1.12  | ±1.48   | 0.0405553                          | ±0.0003788 | 0.00005023                         | ±0.00004699 |
| 13   | 17.0%      | Δ 0.100                         | 9.252                          | 1.204                          | 76.215                        | 1851.828          | 24.97 | ±0.27 | 98.36             | 5.41                          | 3.54  | ±7.38   | 0.0405047                          | ±0.0002326 | 0.00005307                         | ±0.00002996 |
| 14   | 18.5%      | Δ 0.286                         | 9.441                          | 1.471                          | 106.351                       | 2581.813          | 24.95 | ±0.22 | 96.74             | 7.54                          | 4.84  | ±12.17  | 0.0398726                          | ±0.0001874 | 0.00010732                         | ±0.00002418 |
| 15   | 20.0%      | Δ 0.088                         | 7.017                          | 0.554                          | 28.403                        | 684.392           | 24.77 | ±0.68 | 96.25             | 2.01                          | 1.74  | ±5.31   | 0.0399665                          | ±0.0005401 | 0.00012386                         | ±0.00007755 |
| 16   | 22.0%      | Δ 0.150                         | 11.581                         | 0.877                          | 57.003                        | 1392.524          | 25.11 | ±0.32 | 96.83             | 4.04                          | 2.12  | ±3.53   | 0.0396602                          | ±0.0002697 | 0.00010432                         | ±0.00003560 |
| 17   | 25.0%      | Δ 0.118                         | 11.891                         | 0.833                          | 47.577                        | 1171.562          | 25.31 | ±0.39 | 97.04             | 3.37                          | 1.72  | ±2.96   | 0.0394286                          | ±0.0002905 | 0.00009740                         | ±0.00004387 |
| 18   | 30.0%      | Δ 0.152                         | 12.541                         | 0.393                          | 30.802                        | 753.445           | 25.14 | ±0.65 | 94.27             | 2.18                          | 1.06  | ±1.59   | 0.0385595                          | ±0.0004587 | 0.00019022                         | ±0.00007240 |
