# Supplementary material for: Sample neutron irradiation with the Min Jiang Testing Reactor (MJTR): implications for high-precision 40Ar/39Ar dating
Source: Royal Society of Chemistry journal article supplement (doi:10.1039/d3ja00048f), 2023-01-01
Supplement: d3ja00048f3.pdf [file d3ja00048f3.pdf]

Table S2 Comparison of nuclear reactors used for  $^{40}\text{Ar}/^{39}\text{Ar}$  irradiations

| Reactor                | Slow/fast      | $(^{36}\text{Ar}/^{37}\text{Ar})_{\text{Ca}}$       | $(^{39}\text{Ar}/^{37}\text{Ar})_{\text{Ca}}$       | $(^{40}\text{Ar}/^{39}\text{Ar})_{\text{K}}$ | Cd shielding      | J/h              | Vertical gradients | Horizontal gradients | Reference                                             |
|------------------------|----------------|-----------------------------------------------------|-----------------------------------------------------|----------------------------------------------|-------------------|------------------|--------------------|----------------------|-------------------------------------------------------|
| (irradiation position) | neutron flux   | $\times 10^{-4}$                                    | $\times 10^{-4}$                                    | $\times 10^{-4}$                             | (mm)              | $\times 10^{-4}$ | %/cm               | %/cm                 |                                                       |
| MJTR                   | 3.8            | $4.17 \pm 0.07$                                     | $18.4 \pm 3.6$                                      | $146.5 \pm 42.4$                             | 0.5               | 0.21             | ~0.68              | 0.45                 | This study                                            |
| CMRR                   | - <sup>1</sup> | 2.34                                                | 6.17                                                | 23.2                                         | 0.5               | 3.4              | -                  | -                    | (Bai et al., 2021)                                    |
| HFETR                  | 0.1            | $3.52 \pm 0.11$                                     | 10.9 - 15                                           | ~92.3 -<br>~188.0                            | 0.5               | 2.8              | 3.3                | 7.1                  | (Li et al., 2019)                                     |
| 49-2(H4)               | -              | 2.64                                                | 6.87                                                | 71.5                                         | 0.5               | 1.7              | -                  | -                    | (Wang et al., 1986)                                   |
| 49-2(E7)               | 2.5            | $1.17 \pm 0.05$                                     | $7.56 \pm 0.30$                                     | $239 \pm 12$                                 | -                 | 0.58             | -                  | 0.1                  | (Wang et al., 1985)                                   |
| 49-2(H8)               | -              | $2.78 \pm 0.14$                                     | $8.52 \pm 0.28$                                     | $11.82 \pm 1.2$                              | -                 | 2.1              | 0.7                | -                    | (Wang et al., 2009)                                   |
| CLICIT                 | -              | $2.700 \pm 0.0004$                                  | $7.02 \pm 0.12$                                     | $7.3 \pm 0.9$                                | -                 | 2.63-<br>2.78    | 0.7 -1.6           | -                    | (Renne et al., 2008; Renne et al., 2015)              |
| CLOCIT                 |                | $2.65 \pm 0.01$                                     | $9.10 \pm 0.28$                                     | $4 \pm 6$                                    | -                 | 1.45-<br>1.53    | 0.6-1.0%           | -                    | (Rutte et al., 2018)                                  |
| GSTR                   | 0.9            | $2.64 \pm 0.017$                                    | $6.73 \pm 0.037$                                    | $59 \pm 7$<br>$101 \pm 5$<br>$10 \pm 10$     | No                | 2.5              | 3.5                | <0.5                 | (Dalrymple et al., 1981)                              |
| HFBR (core)            | 0.65           | $2.31 \pm 0.01$                                     | $6.45 \pm 0.29$                                     | <20<br>$123 \pm 24$                          | -                 | 35               | -                  | -                    | (Alexander and K., 1974)                              |
| Herald (core)          | 1.7            | -                                                   | -                                                   | -                                            | -                 | 2.8              | -                  | -                    | (Brereton, 1970; Brereton, 1972; Turner et al., 1973) |
| GETR                   | 7.5            | $1.1 \pm 0.2$<br>$3.05 \pm 0.06$<br>$3.15 \pm 0.09$ | $6.7 \pm 0.3$<br>$7.32 \pm 0.15$<br>$7.23 \pm 0.28$ | $164 \pm 13$<br>$625 \pm 9$                  | -                 | 4                | -                  | -                    | (Alexander and K., 1974)                              |
| JMTR                   | 12.1           | $3.61 \pm 0.17$                                     | $7.96 \pm 0.2$                                      | $140.1 \pm 85.8$<br>$3008 \pm 138$           | 0.8<br>No         | 1.7              | 1.5                | 13                   | (Ishizuka, 1998)                                      |
| HIFAR                  | ~50            | $3.06 \pm 0.02$                                     | $7.27 \pm 0.5$                                      | $270 \pm 20$<br>$30 \pm 10$<br>~20           | 0.2<br>0.5<br>1.0 | 0.2              | 13                 | -                    | (Mcdougall, 1985)                                     |
| McMaster               | 19             | $2.54 \pm 0.09$                                     | $6.51 \pm 0.31$                                     | $156 \pm 4$                                  | -                 | 1.1              | -                  | -                    | (Bottomley and Derekyork, 1976)                       |
| Ford (H-5)             | -              | 2.21-2.26                                           | 8.00-8.25                                           | 250-470                                      | -                 | 0.78             | 0.4                | -                    | (Heizler and Markharrison, 1988; Foland et al., 1989) |

|        |    |                 |                 |               |       |      |     |     |                              |
|--------|----|-----------------|-----------------|---------------|-------|------|-----|-----|------------------------------|
| FR-2   |    | $2.7 \pm 0.2$   | $6.85 \pm 0.20$ | -             | -     | -    | 0.5 | -   | (Stettler et al., 1974)      |
| RRF    | 13 | $2.13 \pm 0.04$ | $10.2 \pm 0.3$  | $1340 \pm 10$ | -     | 0.56 | -   | -   | (Kameshwaran et al., 1983)   |
| FRG-1  | -  | $41.4 \pm 2.3$  | $9.3 \pm 0.1$   | $141 \pm 2$   | 0.2mm | 0.24 | 5.9 | 1.8 | (Schwarz and Trieloff, 2007) |
| LVR-15 | -  | -               | -               | -             | Yes   | -    | 2.1 | 2.2 | (Rutte et al., 2015)         |

Note: <sup>1</sup> “-” represent not mentioned in the literature.

MJTR: Min Jiang Testing Reactor of the Nuclear Power Institute of China;

CMRR: China Mianyang Research Reactor of the China Academy of Engineering Physics;

HFETR: High Flux Engineering Test Reactor of the NPIC;

49-2: 49-2 research reactor of the Institute of Atomic Energy;

CLOCIT: The Cadmium-Lined Outer-Core Irradiation Tube;

CLICIT: The Cadmium-Lined Inner-Core Irradiation Tube;

GSTR: Geological Survey TRIGA Reactor;

HFBR: High Flux Beam Reactor of Brookhaven National Laboratory;

Herald: herald reactor at AWRE Aldermaston;

GETR: General electric test reactor, vallecitos nuclear center, Pleasanton California;

JMTR: Japan Material Testing Reactor;

HIFAR: High Flux Australian Reactor;

McMaster: enriched-uranium reactor at McMaster University;

Ford: Ford Nuclear Reactor at the University of Michigan;

FR-2: reactor 2 in the Federal Republic of Germany;

RRF: Research Reactor Facility, University of Missouri (Columbia);

FRG-1: the reactor 1 in the Federal Republic of Germany;

LVR-15: the a Light Water Reactor-15 installed in the Czech Republic;

## References:

- Alexander, E.C., and K., D.P., 1974,  $^{40}\text{Ar}/^{39}\text{Ar}$  ages and trace element contents of Apollo 14 breccias; an interlaboratory cross-calibration of  $^{40}\text{Ar}/^{39}\text{Ar}$  standards: *Geochimica Et Cosmochimica Acta*, v. 38, p. 911-928.
- Bai, X.J., Liu, M., Hu, R.G., Fang, Y., Liu, X., Tang, B., and Qiu, H.N., 2021, Well-Constrained Mineralization Ages by Integrated  $^{40}\text{Ar}/^{39}\text{Ar}$  and U-Pb Dating Techniques for the Xitian W-Sn Polymetallic Deposit, South China: *Economic Geology*.
- Bottomley, R.J., and Derekyork, 1976,  $^{40}\text{Ar}/^{39}\text{Ar}$  age determinations on the Owyhee basalt of the Columbia Plateau: *Earth and Planetary Science Letters*, v. 31, p. 75-84.
- Brereton, N.R., 1970, Corrections for interfering isotopes in  $^{40}\text{Ar}/^{39}\text{Ar}$  dating: *Earth and Planetary Science Letters*, v. 8, p. 427-&.
- Brereton, N.R., 1972, A Reappraisal of the  $^{40}\text{Ar}/^{39}\text{Ar}$  Stepwise Degassing Technique: *Geophysical Journal International*, v. 27, p. 449-478.
- Dalrymple, G.B., Alexander, E.C., Jr., L.M.A., and Kraker, G.P., 1981, Irradiation of samples for  $^{40}\text{Ar}/^{39}\text{Ar}$  dating using the geological survey triga reactor: U.S. Geological Survey Professional Paper, v. 1176, p. 55.
- Foland, K.A., Chen, J.F., Linder, J.S., Henderson, C., and Whillans, I.M., 1989, High-resolution  $^{40}\text{Ar}/^{39}\text{Ar}$  chronology of multiple intrusion igneous complexes - Application to the cretaceous mount brome complex, Quebec: *Contributions to Mineralogy and Petrology*, v. 102, p. 127-137.
- Heizler, M.T., and Markharrison, T., 1988, Multiple trapped argon isotope components revealed by  $^{40}\text{Ar}/^{39}\text{Ar}$  isochron analysis: *Geochimica Et Cosmochimica Acta*, v. 52, p. 1295-1303.
- Ishizuka, O., 1998, Vertical and horizontal variations of the fast neutron flux in a single irradiation capsule and their significance in the laser-heating  $^{40}\text{Ar}/^{39}\text{Ar}$  analysis: Case study for the hydraulic rabbit facility of the JMTR reactor, Japan: *Geochemical Journal*, v. 32, p. 243-252.
- Kameshwaran, A., Sam, D., Rashika, R.S., Kanya, N., Narayanan, P.L., and Hariharan, R., 1983,  $^{129}\text{Xe}$ - $^{128}\text{Xe}$  and  $^{40}\text{Ar}/^{39}\text{Ar}$  chronology of two Antarctic enstatite meteorites: *Memoirs of National Institute of Polar Research. Special issue*, v. 30, p. 275-291.
- Mcdougall, I., 1985, K-Ar and  $^{40}\text{Ar}/^{39}\text{Ar}$  dating of the hominid-bearing Pliocene-Pleistocene sequence at Koobi Fora, Lake Turkana, northern Kenya: *Geological Society of America Bulletin*, v. 96, p. 159-175.
- Renne, P.R., Sharp, Z.D., and Heizler, M.T., 2008, Cl-derived argon isotope production in the CLICIT facility of OSTR reactor and the effects of the Cl-correction in  $^{40}\text{Ar}/^{39}\text{Ar}$  geochronology: *Chemical Geology*, v. 255, p. 463-466.
- Renne, P.R., Sprain, C.J., Richards, M.A., Self, S., Vanderkluysen, L., and Pande, K., 2015, State shift in Deccan volcanism at the Cretaceous-Paleogene boundary, possibly induced by impact: *Science*, v. 350, p. 76-8.
- Rutte, D., Becker, T.A., Deino, A.L., Reese, S.R., Renne, P.R., and Schickler, R.A., 2018, The New CLOCIT Irradiation Facility for  $^{40}\text{Ar}/^{39}\text{Ar}$  Geochronology: Characterisation, Comparison with CLICIT and Implications for High - Precision Geochronology: *Geostandards and Geoanalytical Research*, v. 42, p. 301-307.

- Rutte, D., Pfänder, J.A., Kolečka, M., Jonckheere, R., and Unterricker, S., 2015, Radial fast-neutron fluence gradients during rotating  $^{40}\text{Ar}/^{39}\text{Ar}$  sample irradiation recorded with metallic fluence monitors and geological age standards: *Geochemistry, Geophysics, Geosystems*, v. 16, p. 336-345.
- Schwarz, W.H., and Trieloff, M., 2007, Intercalibration of  $^{40}\text{Ar}/^{39}\text{Ar}$  age standards NL-25, HB3gr hornblende, GA1550, SB-3, HD-B1 biotite and BMus/2 muscovite: *Chemical Geology*, v. 242, p. 218-231.
- Stettler, A., Eberhardt, P., Geiss, J., Groegler, N., and Maurer, P., 1974, On the duration of lava flow activity in Mare Tranquillitatis: *Geochimica et Cosmochimica Acta Supplement 5 (Proceedings of the fifth Lunar Science Conference)*, v. 2, p. 1557-1570.
- Turner, G., Cadogan, P.H., and Yonge., C.J., 1973, Argon selenochronology: *Geochimica et Cosmochimica Acta Supplement 4 (Proceedings of the fourth Lunar Science Conference)*, v. 2, p. 1889-1914.
- Wang, F., Zheng, X.S., Lee, J.I.K., Choe, W.H., Evans, N., and Zhu, R.X., 2009, An  $^{40}\text{Ar}/^{39}\text{Ar}$  geochronology on a mid-Eocene igneous event on the Barton and Weaver peninsulas: Implications for the dynamic setting of the Antarctic Peninsula: *Geochemistry, Geophysics, Geosystems*, v. 10, p. 1-29.
- J.J. Li, H.B. Liu, J. Zhang, G.S. Jin, J.F. Zhang, J. Han, and X. Shi, 2019, v. 44, p. 727-737(In chinese with English abstract).
- S.S. Wang, M.G. Zhai, S.L. Hu, H.Q. Sang, and J. Qiu, 1986, p. 97-100(In chinese with English abstract).
- S.S. Wang, H.Q. Sang, S.L. Hu, and J. Qiu, 1985, p. 35-44(In chinese with English abstract).
